1 **Prawn aquaculture as a method for schistosomiasis control and poverty**  
2 **alleviation: a win-win approach to address a critical infectious disease of**  
3 **poverty**

4  
5 Authors & Affiliations:

6 Christopher M. Hoover<sup>1</sup>, Susanne H. Sokolow<sup>2,3</sup>, Jonas Kemp<sup>4†</sup>, James N. Sanchirico<sup>5</sup>, Andrea J.  
7 Lund<sup>6</sup>, Isabel Jones<sup>2</sup>, Tyler Higginson<sup>7</sup>, Gilles Riveau<sup>8</sup>, Amit Savaya-Alkalay<sup>9</sup>, Shawn Coyle<sup>10</sup>,  
8 Chelsea L. Wood<sup>11</sup>, Fiorenza Micheli<sup>2</sup>, Renato Casagrandi<sup>12</sup>, Lorenzo Mari<sup>12</sup>, Marino Gatto<sup>12</sup>,  
9 Andrea Rinaldo<sup>13</sup>, Javier Perez-Saez<sup>13</sup>, Jason R. Rohr<sup>14,15</sup>, Amir Sagi<sup>9</sup>, Justin V. Remais<sup>1,§</sup>, Giulio  
10 A. De Leo<sup>2,3,§,\*</sup>

11  
12 <sup>1</sup> Division of Environmental Health Sciences, University of California, Berkeley School of Public  
13 Health, Berkeley, CA 94720 USA

14 <sup>2</sup> Department of Biology, Hopkins Marine Station, Stanford University, Pacific Grove, CA 93950  
15 USA

16 <sup>3</sup> Woods Institute for the Environment and Center for Innovation in Global Health, Stanford  
17 University, Stanford, CA 94305 USA

18 <sup>4</sup> Program in Human Biology, Stanford University, Stanford, CA 94305 USA

19 <sup>5</sup> Department of Environmental Science and Policy, University of California, Davis, Davis, CA  
20 95616 USA

21 <sup>6</sup> Emmett Interdisciplinary Program in Environment and Resources, School of Earth, Energy and  
22 Environmental Sciences, Stanford University, Stanford, CA 94305 USA

23 <sup>7</sup> Middlebury Institute of International Studies at Monterey, Monterey, CA 93940 USA

24 <sup>8</sup> Biomedical Research Center EPLS, Saint Louis, Senegal

25 <sup>9</sup> Department of Life Sciences and the National Institute for Biotechnology in the Negev, Ben  
26 Gurion University of the Negev, Beer Sheva, Israel.

27 <sup>10</sup> Kentucky State University, Aquaculture Division, Aquaculture Research Center, Frankfort, KY  
28 40601 USA.

29 <sup>11</sup> University of Washington, School of Aquatic and Fishery Sciences, Seattle, WA 98195 USA.

30 <sup>12</sup> Dipartimento di Elettronica, Informazione e Bioingegneria, Politecnico di Milano, 20133  
31 Milano, Italy

32 <sup>13</sup> Laboratory of Ecohydrology, School of Architecture, Civil and Environmental Engineering,  
33 Ecole Polytechnique Fédérale de Lausanne, CH-1015 Switzerland

34 <sup>14</sup> Department of Biological Sciences, University of Notre Dame, Notre Dame, IN, 46556 USA

35 <sup>15</sup> Department of Integrative Biology, University of South Florida, Tampa, FL, 33620 USA

36 † Now at Google Brain

37 \* Corresponding author

38 § Denotes shared senior authorship

39

40 **Abstract**

41 Recent evidence suggests crustacean snail predators may aid schistosomiasis control  
42 programs by targeting the environmental component of the parasite's life cycle through  
43 predation of the snail species that serve as intermediate hosts of the parasite. We evaluate  
44 costs, benefits, and potential synergies between schistosomiasis control and aquaculture of  
45 giant prawns using an integrated bio-economic-epidemiologic model. We identified  
46 combinations of stocking density and aquaculture cycle length that maximize profit and offer  
47 disease control benefits for sustainable schistosomiasis control. We consider two prawn  
48 species in sub-Saharan Africa: the endemic, non-domesticated *Macrobrachium vollenhovenii*,  
49 and the non-native, domesticated *Macrobrachium rosenbergii*. We find that, at profit-optimal  
50 densities, both *M. rosenbergii* and *M. vollenhovenii* can complement conventional control  
51 approaches (mass drug treatment of people) and lead to sustainable schistosomiasis control.  
52 We conclude that integrated aquaculture strategies can be a win-win strategy in terms of  
53 health and sustainable development in schistosomiasis endemic regions of the world.

54 **Main**

55 Schistosomiasis is a debilitating disease of poverty, affecting around 200 million people  
56 worldwide<sup>1,2</sup>. It is caused by trematode parasites of the genus *Schistosoma* that undergo a life  
57 cycle involving passage between definitive human hosts and freshwater snails that act as  
58 intermediate hosts. While safe and effective treatments, such as the anthelmintic drug  
59 Praziquantel, are available to reduce parasite burden and associated symptoms from infected  
60 individuals, rapid reinfection in highly endemic areas leads to persistent hotspots of  
61 infection<sup>3,4</sup>. Successful long-term elimination efforts may require strategies that go beyond  
62 conventional mass drug administration (MDA) campaigns to explicitly target the  
63 environmental reservoir of the disease<sup>5</sup>.

64 One option for reducing transmission is cultivating snail predators, such as river prawns,  
65 via aquaculture. River prawns have been shown to reduce schistosomiasis transmission by  
66 consuming snails in the aquatic environment where people contact infested water<sup>14,15</sup>. Given  
67 that schistosomiasis is a disease of poverty, combining the nutritional and economic benefits  
68 of prawn aquaculture with disease control via prawn predation on snails may offer a  
69 sustainable approach to combat schistosomiasis and improve well-being and economic  
70 development in endemic areas. Here, we develop an integrated bio-economic-epidemiologic  
71 model to investigate whether extensive prawn aquaculture (using either endemic *M.*  
72 *vollenhovenii* or nonbreeding monosex aquaculture of *M. rosenbergii*) can be managed at  
73 schistosome transmission sites such as rice paddies or enclosed points of water contact  
74 where people are exposed<sup>15</sup> to simultaneously maximize profit and control schistosomiasis.

75 There is a rich history of environmental interventions for schistosomiasis that target the  
76 intermediate snail hosts<sup>6</sup>. Molluscicides are effective in reducing snail populations and have  
77 been used in integrated campaigns to control schistosomiasis in areas of South America,  
78 Northern Africa, and Southeast Asia<sup>6-8</sup>. However, these approaches generally require

79 repeated applications of chemicals that may negatively affect non-target species in addition  
80 to *Schistosoma*-bearing snails<sup>9,10</sup>. A more sustainable approach for snail control involves the  
81 introduction of snail predators, such as river prawns, which have been shown to actively seek  
82 out and consume important intermediate hosts for human schistosomes in laboratory  
83 settings, including *Biomphalaria* and *Bulinus* snails<sup>11-13</sup>. Field trials in which crustacean  
84 predators have been introduced to reduce schistosomiasis transmission have been successful  
85 in reducing reinfection rates in humans following MDA<sup>14,15</sup>.

86 In addition to being voracious predators of snails<sup>13,16</sup>, river prawns are a valuable food  
87 commodity<sup>17,18</sup>. The giant freshwater prawn *Macrobrachium rosenbergii* has been  
88 domesticated and widely used in commercial hatchery-based aquaculture<sup>19</sup>, providing both  
89 a key source of protein and encouraging local economic development<sup>20</sup>. Furthermore,  
90 advances in the production of nonbreeding *M. rosenbergii* monosex populations reduces the  
91 risk of prawn invasion in areas this species is not native, suggesting safe use of this biological  
92 control agent globally<sup>21,22</sup>. In sub-Saharan Africa, where at least 90% of schistosomiasis cases  
93 occur<sup>1,23</sup>, the native African river prawn *M. vollehovenii* has been proposed as an alternative  
94 to *M. rosenbergii* for aquaculture<sup>21</sup>. Research into scalable *M. vollehovenii* aquaculture is  
95 ongoing, as the use of this native species may be more attractive due to its historical presence  
96 in the local river ecology in western Africa.

97 Extensive prawn aquaculture, increasingly common in developing countries<sup>17-19</sup>,  
98 consists of large enclosures, low prawn densities, and no use of supplemental feed, substrate,  
99 or additional oxygenation. As such, extensive aquaculture is more compatible with the water  
100 resource management needs of rural communities in key areas of sub-Saharan Africa, and  
101 can be easily integrated into rice agriculture that is increasingly an important part of food  
102 production and is present in many schistosomiasis endemic areas<sup>24,25</sup>.

103       Scaling the prawn aquaculture approach for schistosomiasis control requires that the  
104 economic goals of prawn aquaculture are compatible with the public health goal of  
105 schistosomiasis control. Thus, we seek to identify conditions under which schistosomiasis  
106 reinfection in the human population may be curbed while maximizing the economic benefit  
107 of prawn aquaculture. We first develop a bio-economic production model of *Macrobrachium*  
108 spp. aquaculture to identify the stocking density and duration of the grow out phase that  
109 maximizes profit for *M. rosenbergii* and *M. vollehovienii*. Then, we expand an epidemiologic  
110 model of schistosomiasis transmission dynamics to include snail size structure and infection  
111 dynamics. This model is coupled with the aquaculture model through size- and density-  
112 dependent prawn predation, and parameterized via results of previous laboratory and field-  
113 based empirical studies. We use estimates of the disability adjusted life years (DALYs) lost  
114 due to schistosomiasis infection derived from the integrated model to compare aquaculture-  
115 based prawn interventions with conventional MDA interventions, and to estimate the  
116 benefits of utilizing both MDA and prawn aquaculture for schistosomiasis control. We  
117 conclude with an extensive sensitivity analysis to evaluate the feasibility of such  
118 interventions in a variety of settings.

## 119 **Methods**

120       The integrated model has three components: a) a bio-economic aquaculture component,  
121 simulating yields and accounting for density-dependent mortality and somatic growth of  
122 *Macrobrachium* spp. prawns over a range of initial stocking densities; b) an epidemiologic  
123 component to simulate the dynamics of mean schistosome worm burden in humans and  
124 population and infection dynamics of intermediate-host snails through a size structured, SEI  
125 compartmental model; and c) a predation function describing the rate at which prawns  
126 consume snails as a function of snail density and of snail and prawn body sizes, which links  
127 the epidemiologic and aquaculture models.

128 **(a) Aquaculture model**

129 We assume that a necessary supply chain of hatcheries and nurseries supplies juvenile  
130 prawns to stock at the desired transmission sites. The dynamics of a cohort of  $P_0$  juvenile  
131 prawns of initial mean length,  $L_0$  [mm], stocked at time  $t = 0$  days in an enclosure of  
132  $1,000 \text{ m}^2$ —a size consistent with either a large water contact site or a typical rice field in  
133 small-scale, subsistence agriculture settings—are simulated over time as a function of  
134 density-dependent and size-dependent growth and mortality.

135 Adult *Macrobrachium rosenbergii* males can be grouped in three different categories that  
136 grow at different rates depending upon their body size and developmental phase: small males  
137 (SM) between 5-20g, orange-clawed males (OC) between 30-180g, and blue-clawed male  
138 (BC) reaching up to 250 g, with growth of some smaller prawns being suppressed by the  
139 largest BC males <sup>26</sup>. Though this same social structure has not been investigated for *M.*  
140 *volenhovenii*, we assume here that it is the same. Growth of individual crustaceans is typically  
141 stepwise and occurs through a sequence of molting events, but here the population-average  
142 growth of prawns is modeled as somatic growth with the von Bertalanffy growth equation  
143 (VBGE) <sup>27</sup>:

144 
$$\frac{dL}{dt} = k^*(L_\infty - L) \quad (1)$$

145 VBGE produces a classic increasing-and-saturating growth curve with length  $L$  at time  $t$  (days  
146 after stocking) eventually approaching the mean asymptotic length,  $L_\infty$ . Based on  
147 experimental stocking trials showing reduced growth rates of *M. rosenbergii* at high stocking  
148 densities <sup>26</sup>, a modified Brody growth coefficient,  $k^*$ , was estimated as a decreasing function  
149 of total population biomass,  $\Omega$ :

150 
$$k^*(\Omega) = \frac{k_{max}}{1 + \gamma\Omega(t)} \quad (2)$$

151 where  $k_{max}$  is the maximum value of the Brody coefficient at low densities and  $\gamma$  a coefficient  
152 parameterized to produce a density-dependent reduction in somatic growth qualitatively  
153 resembling that observed in experimental trials <sup>26</sup>.

154 Total population biomass,  $\Omega(t)$ , is computed as the product of mean prawn body size in  
155 grams,  $B(t)$ , and population size,  $P(t)$ ,  $t$  days after stocking:

$$156 \quad \Omega(t) = B(t)P(t) \quad (3)$$

157 Body size  $B(t)$  is derived as an allometric function of prawn length,  $L(t)$ , from *M. rosenbergii*  
158 grow-out data <sup>28,29</sup>:

$$159 \quad B(t) = a_p L(t)^{b_p} \quad (4)$$

160 As prawns are generalist consumers with a wide range of invertebrate fauna and organic  
161 detritus in their diet <sup>30</sup>, growth as described by eq. 1-4 is assumed independent from snails'  
162 density and the corresponding predation rates.

163 After stocking, the total number of prawns in the enclosure decreases over time, with *per-*  
164 *capita* mortality rate modeled as an additive function of two components: (i) an exponentially  
165 decreasing function of body size,  $B(t)$ , as large prawns exhibit lower mortality than small  
166 prawns <sup>31</sup>; (ii) a linearly increasing function of total population biomass,  $\Omega(t)$ , which accounts  
167 for density-dependent competition for resources and cannibalism at high population  
168 densities <sup>26</sup>. Accordingly, the dynamics of a cohort of initial size  $P_0$  was described as follows:

$$169 \quad \frac{dP}{dt} = -P(\mu_p B^{-d} + \omega \Omega) \quad (5)$$

170 with parameters  $\mu_p$  and  $d$  derived from previous studies <sup>31,32</sup> and  $\omega$  parameterized to  
171 produce density-dependent mortality outcomes qualitatively similar to those observed in the  
172 experimental trials by Ranjeet and Kurup <sup>26</sup>. Natural recruitment is excluded from the  
173 aquaculture model, as new prawns enter the system only in discrete, exogenously controlled

174 events, when  $P_0$  prawns of initial average body size  $L_0$  are stocked from nurseries and grown  
175 out to market size. We assume natural, size- and density-dependent mortality are the only  
176 causes of prawn population decline and do not consider other sources such as predation by  
177 e.g. seabirds, escape from enclosures or rice fields, disease outbreaks, or declines in water  
178 quality that may affect prawn health.

179 Prawns weighing <30g are generally not of commercial interest, therefore only OC and  
180 BC males are considered marketable. Experimental trials by Ranjeet and Kurup with *M.*  
181 *rosenbergii*<sup>26</sup> showed the fraction of retrievable, market-size (>30g) prawns decreases  
182 linearly with increasing prawn stocking density. Accordingly, commercial yield at the end of  
183 a production cycle of length  $t = T$  is only a fraction of the total biomass:

$$184 \quad Y(T, P_0) = \zeta(P_0) \cdot \Omega(T) \quad (6)$$

185 where  $\zeta$ , the fraction of marketable size prawns in the population, is a decreasing function of  
186 initial stocking density  $P_0$  estimated from data in the Ranjeet and Kurup experiments<sup>26</sup>.

187 Cumulative profits over a finite time horizon are determined by the profit produced per  
188 cycle and the number of cycles completed within the given time period. In a time period of  
189  $T_{max}$  days, the number of aquaculture cycles completed for each *Macrobrachium* species (sp)  
190 is  $n^{sp} = \text{round}(\frac{T_{max}}{T})$ . Cumulative discounted profit for each species,  $CP^{sp}$ , is then estimated  
191 as the sum of net discounted revenue for every cycle completed by  $T_{max}$ :

$$CP^{sp}(P_0, T, T_{max}) = \sum_{n=1}^{n^{sp}} (-cP_0 + pY(T, P_0))e^{-\delta nT} \quad (7)$$

192 where  $p$  is the price per unit weight (USD/kg),  $c$  the per capita cost of stocked juvenile  
193 prawns, and  $\delta$  the discount rate to account for the time lag between initial stocking costs and  
194 delayed revenues of commercial size prawns. Following the comprehensive price analysis by  
195 Dasgupta and Tidwell, we set  $c = \$0.10/P$  for a juvenile prawn of  $L_0 = 40mm$



196 (corresponding to  $\sim 0.35g$  juvenile prawns) and  $p = \$12/kg$  harvested<sup>33</sup>. The discount rate  
197 is set to 7%, which is likely on the low end for sub-Saharan African countries endemic with  
198 schistosomiasis but higher than the 3-4% rate used for discounting long term government  
199 projects in the United States<sup>34</sup>. Other costs such as maintaining nurseries to produce juvenile  
200 prawns are considered external to the aquaculture scenario considered here and are  
201 therefore not included in the profit estimation. The influence of such costs are considered in  
202 additional sensitivity analyses described below.

203 Cumulative discounted profits are maximized by jointly choosing the rotation length,  $T$ ,  
204 and the initial stocking density,  $P_0$ . Given the rotation length, the number of rotations in the  
205 time period is determined, as  $T_{max}$  is given. Equation 7 has its basis in the optimal rotation  
206 models in forestry (see, e.g.,<sup>35</sup>) and commercial aquaculture operations (see, e.g.,<sup>36,37</sup>) which  
207 balance the marginal benefits of further growth against the opportunity costs of waiting to  
208 harvest. The resulting optimal rotation length is therefore shorter than a simple rule of when  
209 to harvest based solely on maximizing growth dynamics. In our setting, we expect the same  
210 trade-off between benefits from waiting to harvest the prawns at a larger size against the  
211 opportunity costs of delaying the economic returns from future harvests.

212 Parameters used in the prawn aquaculture model simulations are listed in Table S1.

213 **(b) Epidemiologic model**

214 Building on our previous modeling of *S. haematobium*<sup>15,38</sup>, the infection dynamics of the  
215 intermediate host snail population,  $N$ , are modeled as snails transition between  $i \in \{S, E, I\}$   
216 infection compartments corresponding to susceptible ( $S$ ), exposed ( $E$ , pre-patent), and  
217 infected ( $I$ , patent) states. Furthermore, the growth dynamics of snails are modeled as they  
218 move through  $j \in \{1, 2, 3\}$  size classes corresponding to  $4mm$ ,  $8mm$ , and  $12mm$  mean snail  
219 diameter (Fig. 1). The model is further extended to include snail migration with a constant  
220 migration rate,  $\xi$ , to and from an external population,  $N^E$ , that is not affected by prawn  
221 interventions. For simplicity, the external population is conceptualized to originate from an  
222 identical transmission site to the one in which interventions are modeled, though in reality,  
223 multiple sites with heterogeneous transmission dynamics may contribute differentially to the  
224 intervention site.

225

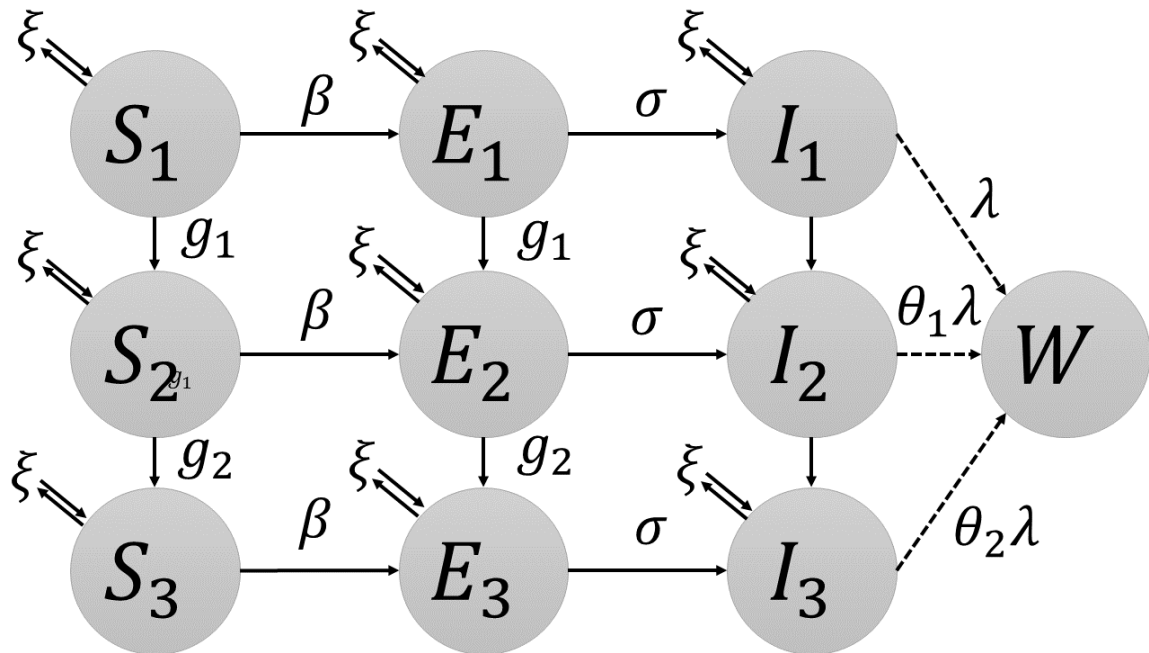

226

227

228

229

**Figure 1:** Epidemiologic model schematic with snail size and infection classes. Parameters governing transitions between classes and migration into and out of each class are shown.

230 New snails enter the population as susceptible juveniles, i.e. in infection class  $i = S$  and  
231 size class  $j = 1$ . Logistic snail population growth is modeled with *per-capita* recruitment,  $f$ ,  
232 and carrying capacity,  $K$ . Neither small snails ( $j = 1$ ) nor infectious snails ( $i = I$ ) contribute  
233 to recruitment due to sexual immaturity and parasitic castration, respectively<sup>39</sup>. Pre-patent  
234 snails' contribution to recruitment is reduced by a fraction  $0 < z < 1$ <sup>40</sup>. Snails of each size  
235 class are subject to both size-dependent natural mortality,  $\mu_j$ , and predation mortality,  $\psi_j$ , a  
236 function of both prawn and snail body size and density described in the next section. Small  
237 and medium snails grow and transition to the next size class at the per capita rate  $g_1$  (from  
238 size class 1 to 2) and  $g_2$  (from class 2 to 3), respectively.

239 New snail infections occur at the per capita rate,  $\beta M$ , where  $\beta$  is the transmission rate  
240 and  $M = 0.5\phi(W)WHm$  is an estimate of the overall number of *Schistosoma* miracidia (free  
241 living infective stages) produced by mated adult female worms. This estimate is the product  
242 of the size of definitive human host population,  $H$ , the mean parasite burden,  $W$ , (i.e., mean  
243 number of adult worms per person), the rate at which mated adult female worms shed eggs  
244 that hatch into infectious miracidia,  $m$ , and the function  $\phi(W)$  representing the density-  
245 dependent mating probability of adult worms<sup>41</sup>. The coefficient 0.5 accounts for the assumed  
246 1:1 sex ratio of adult worms. For simplicity, we assume a constant human population and no  
247 density dependent fecundity of female worms. Following infection, pre-patent snails,  $E$ ,  
248 transition to the patent class,  $I$ , at rate  $\sigma$ , with  $\sigma^{-1}$  being the mean time necessary for  
249 sporocyst development following snail infection with a miracidium.

250 The adult parasite population harbored by definitive human hosts is modeled as the mean  
251 parasite burden in the human population,  $W$ , assuming a negative binomial distribution with  
252 clumping parameter,  $\phi$ <sup>41,42</sup>. Humans acquire adult worms as a result of contact with cercariae  
253 shed from infected snails. Worm acquisition occurs at rate  $\lambda$ , an aggregate parameter  
254 accounting for the *per capita* shedding rate of cercariae by infected snails, cercariae mortality,

255 contact rate, and probability of infection, as described in previous work <sup>15</sup>. The cercarial  
256 shedding rate of medium ( $N_{I2}$ ) and large ( $N_{I3}$ ) snails is assumed to exceed that of small ( $N_{I1}$ )  
257 snails by a factor  $\theta_1$  and  $\theta_2$ , respectively <sup>43</sup>.

258 The full system of differential equations describing the epidemiologic model can be found  
259 in the supplementary information along with model parameters listed in Table S2.

### 260 (c) Prawn predation model

261 As in previous work <sup>38</sup>, the per-capita prawn predation rate on snails of each class,  $\psi_{ij}$ , is  
262 modeled as a type III functional response, described by a generalization of Holling's disk  
263 equation <sup>44</sup>. This produces a sigmoid-shaped function, which increases and saturates at high  
264 prey densities and decreases to approach zero at low prey densities. Previous experiments  
265 by Sokolow et al <sup>13</sup> show that prawn predation of snails changes predictably as a function of  
266 the ratio of prawn biomass to snail body mass,  $r_j$ . Using these experimental data, the attack  
267 rate,  $\alpha$ , is estimated as a log-linear function of the biomass ratio:  $\alpha = \alpha_m * \log(r_j(t))$ . The  
268 handling time,  $T_h$ , is estimated as a reciprocal function of the biomass ratio:  $T_h =$   
269  $(T_{h_m} r_j(t))^{-1}$  where  $\alpha_m$  and  $T_{h_m}$  are coefficients estimated from <sup>13</sup> and  $r_j$  the ratio between  
270 prawn body size and mean snail body size in each class. Laboratory experiments presented  
271 in <sup>13</sup> show that small prawns are unable to feed on large snails ( $j = 3$ ), accordingly,  $\psi = 0$   
272 when  $r_j < 3$ . In addition, the attack rate,  $\alpha$ , derived by Sokolow et al. <sup>13</sup> in controlled  
273 laboratory conditions in  $1m^{-2}$  tanks is penalized by a factor  $0 < \epsilon < 1$  to account for the  
274 reduction in searching efficiency caused by the morphological complexity of foraging in wild  
275 settings.

276 The biomass ratio for each snail size class is estimated as:

277 
$$r_j(t) = \frac{B(t)}{a_N L_{N_j}^{b_N}} \quad (8)$$

278 where  $B(t)$  is prawn body size derived with eq. (4), and the denominator represents snail  
279 mass in each class  $j$ , derived as a simple allometric function of snail shell diameter in each size  
280 class. The *per-capita* attack rate of prawns on snails of size  $j$  and infection class  $i$  is then  
281 estimated as:

$$282 \quad \psi_{ij} = \begin{cases} \frac{\alpha(r_j(t))\epsilon N_{ij}^n}{1 + \sum_{i=S}^L \sum_{j=1}^3 \alpha(r_j(t))\epsilon T_h(r_j(t))N_{ij}^n}, & r_j \geq 3 \\ 0, & r_j < 3 \end{cases} \quad (9)$$

283 Prawn stocking at the considered densities is assumed to have no negative effects on  
284 water quality that may affect prawn survival, growth, predation of snails, or snail population  
285 dynamics, though ongoing field experiments in the lower Senegal River basin show that water  
286 quality may be negatively affected by nets installed to contain prawns introduced at  
287 transmission sites.

288 Parameters of the snail predation component of the combined model are listed in Table S3.

## 289 **Model simulations**

290 We consider a time horizon of  $T_{max} = 10$  years, for comparability to similar analyses  
291 investigating different schistosomiasis intervention strategies<sup>7,45</sup>. Because prawn body size  
292 increases and levels off with time (eq. 1-3), but prawn abundance decreases in time (eq. 5),  
293 both stock biomass and cumulative profit (eq. 7) are unimodal functions of time for any given  
294 initial stocking density,  $P_0$ . Additionally, harvesting prior to peak profit may afford the  
295 opportunity to increase  $n^{sp}$  and therefore sacrifice short term profits to maximize long term  
296 profit. It is thus possible to use equations 1-7 to simulate prawn aquaculture dynamics and  
297 numerically find the stocking density,  $P_0$ , and harvest time,  $T$ , that maximize cumulative  
298 profit. The surface of values  $(P_0, T, CP^{sp}(P_0, T, T_{max}))$  is related to the eumetric curve used in  
299 fishery science to identify the stocking density that maximizes profit<sup>46</sup>. As stocking costs  
300 increase linearly with stocking size,  $P_0$ , while revenues increase less than linearly as a

301 consequence of density-dependent growth and mortality, the surface is unimodal and its  
302 peak represents the maximum achievable cumulative profit,  $CP_{opt}^{sp} =$   
303  $\max(CP^{sp}(P_0, T, T_{max}))$ . Therefore, for each *Macrobrachium* species (*sp*) and a time period  
304 of  $T_{max} = 10$  years it is possible to identify the stocking density,  $P_{0opt}^{sp}$ , and harvest time,  $T_{opt}^{sp}$ ,  
305 that maximize cumulative profit,  $CP_{opt}^{sp}$ , here collectively defined as *optimal management*. We  
306 identify optimal management for each prawn species using a grid search over initial stocking  
307 densities,  $P_0$ , ranging between  $0.5 - 7.5 Pm^{-2}$  and potential harvest times,  $T$ , on each day  
308 between 1 – 730.

309 Given the optimal stocking density,  $P_{0opt}^{sp}$ , that maximizes cumulative profit and the  
310 corresponding optimal harvest time in an individual cycle,  $T_{opt}^{sp}$ , the epidemiologic model is  
311 run under the following scenarios: (1) 10 years of annual MDA with no prawn intervention;  
312 (2) and (3); 10 years of prawn stocking and harvesting under optimal aquaculture  
313 management for each species, as described above; and (4) and (5) 10 years of integrated  
314 annual MDA and prawn intervention under optimal management. In all scenarios, we  
315 simulate the system for an additional 10 years without intervention to explore the potential  
316 for infection rebound in the case the intervention program is ceased.

317 Stocking and harvesting were simulated at regular intervals of  $T_{opt}^{sp}$  days, and were  
318 implemented as instantaneous events that reset the values of  $P$  and  $L$  to match the initial  
319 conditions at the beginning of each stocking cycle (i.e.  $P_{0opt}^{sp}$  and  $L_0$ ). This assumes that all  
320 prawns—regardless of marketability—are harvested and replaced with  $P_{0opt}^{sp}$  juveniles in a  
321 single day. Mass drug administration is implemented as an instantaneous 85% reduction in  
322 mean worm burden,  $W$ , in the same 75% of the human population, corresponding to  
323 assumptions of 85% drug efficacy and 25% systematic non-compliance<sup>45,47</sup>.

324 To compare the effects of different interventions, we model disability associated with  
325 schistosomiasis using the disability adjusted life year (DALY) as in previous analyses <sup>7,48</sup>.  
326 Disability weights measuring the disability associated with a condition for a single year of  
327 life—where 0 is perfect health and 1 is death—were distributed among individuals with  
328 heavy (> 50 eggs per 10mL urine,  $H_{hi}$ ) and light ( $0 < \text{eggs per 10mL urine} \leq 50$ ,  $H_{lo}$ ) *S.*  
329 *haematobium* burdens as defined by WHO guidelines. Total DALYs over the simulation period  
330 are then estimated as:

$$\sum_{t=1}^{T_{max}} \frac{DW_{hi}}{365} H_{hi_t} + \frac{DW_{lo}}{365} H_{lo_t} \quad (10)$$

331 Where  $DW_{hi}$  and  $DW_{lo}$  are the yearly disability weights associated with heavy and light *S.*  
332 *haematobium* burdens, respectively, normalized to a daily estimate to match the dynamics of  
333 the epidemiological component of the model. Details on estimating the number of individuals  
334 in each burden class at each time step of the epidemiological model ( $H_{hi_t}$  and  $H_{lo_t}$ ) are  
335 provided in the supplementary information.

336 The model was coded in R version 3.5.0 and simulated using the solver lsoda from the  
337 package deSolve <sup>49</sup>. To address concerns regarding reproducibility, all model code and data  
338 are included as a supplementary file and are also made freely available online at  
339 [https://github.com/cmhoove14/Prawn\\_fisheries\\_Public\\_health](https://github.com/cmhoove14/Prawn_fisheries_Public_health).

#### 340 **Sensitivity analyses**

341 To quantify the influence of uncertain parameter inputs on key model outcomes, latin  
342 hypercube sampling is performed over parameter ranges in Table S1 to generate a set of  
343 1,000 candidate sets. These parameter sets are used to derive estimates of uncertainty in the  
344 simulations described above. Furthermore, global sensitivity analysis using latin hypercube  
345 sampling and partial rank correlation coefficients (LHS-PRCC) <sup>50,51</sup> is performed with optimal



346 cumulative profit ( $CP_{opt}^{sp}$ ) as the outcome in the prawn aquaculture model, equilibrium  
347 infected snail density ( $N_I$ ) and mean worm burden ( $W$ ) absent prawn or MDA interventions  
348 as the outcomes in the epidemiologic model, and total DALYs accumulated through simulated  
349 10-year combined MDA and prawn interventions as the outcome in the integrated model.  
350 Briefly, PRCC estimates the correlation between a model parameter and a model outcome by  
351 first rank-transforming parameters drawn from an LHS scheme and the corresponding model  
352 outputs, then removing the linear effects of all other model parameters on the parameter of  
353 interest and the outcome, and finally measuring the linear relationship between the rank-  
354 transformed parameter and outcome residuals<sup>50</sup>. Monotonicity of the relationship between  
355 model outputs and all parameters was assessed via scatterplots (Figs S1-S4) prior to  
356 conducting LHS-PRCC sensitivity analyses.

357 Two additional sensitivity analyses are performed to identify profitability thresholds for  
358 the prawn aquaculture model. In the first, fixed costs,  $c_f$ , in the range \$0 – \$1,000 are added  
359 to the per-cycle profit calculation (eqn 7; such that total cost for each cycle is  $-(cP_0 + c_f)$ ) to  
360 represent additional costs that may be incurred with each aquaculture cycle such as labor,  
361 transport of prawns, and nursery costs leading up to stocking. In the second, the prawn  
362 mortality rate,  $\mu_p$ , is multiplied up to 10 times the estimated natural rate to account for  
363 additional sources of prawn loss that may be incurred due to predation, escape, or other  
364 sources of mortality, such as disease.

## 365 **Results**

### 366 **Aquaculture model**

367 With parameters fixed at the values shown in Table 1, stocking *M. rosenbergii* at  $P_0 =$   
368  $2.6 Pm^{-2}$  and harvesting at  $T_{opt}^{ros} = 165 days$  maximizes cumulative ten-year profit while  
369 stocking at  $P_0 = 2.4 Pm^{-2}$  and harvesting at  $T_{opt}^{ros} = 260 days$  maximizes cumulative profit

370 for *M. vollehovenii*. These stocking densities and harvesting times were used to simulate  
371 aquaculture cycles for each species. Figure 2 shows the dynamics of each species run  
372 continuously through two years with vertical dashed lines indicating the optimal time of  
373 harvest,  $T_{opt}^{sp}$ . Prawns grow in length,  $L$ , and weight over time while population size  
374 (measured as density,  $Pm^{-2}$ ) decreases with time as a result of density dependent death from  
375 crowding and natural, size-dependent mortality (Fig 2). These competing effects lead to a  
376 humped function of total harvestable biomass,  $\Omega$ , over time with the peak occurring well  
377 before prawns grow to their full size. Ten-year cumulative profits also have a single peak,  
378 which is determined both by the profit per cycle and the number of cycles possible within the  
379 10 year time frame. Cumulative profits are maximized by harvesting well before the peak in  
380 harvestable biomass occurs, indicating more, smaller harvests maximize profit over time.

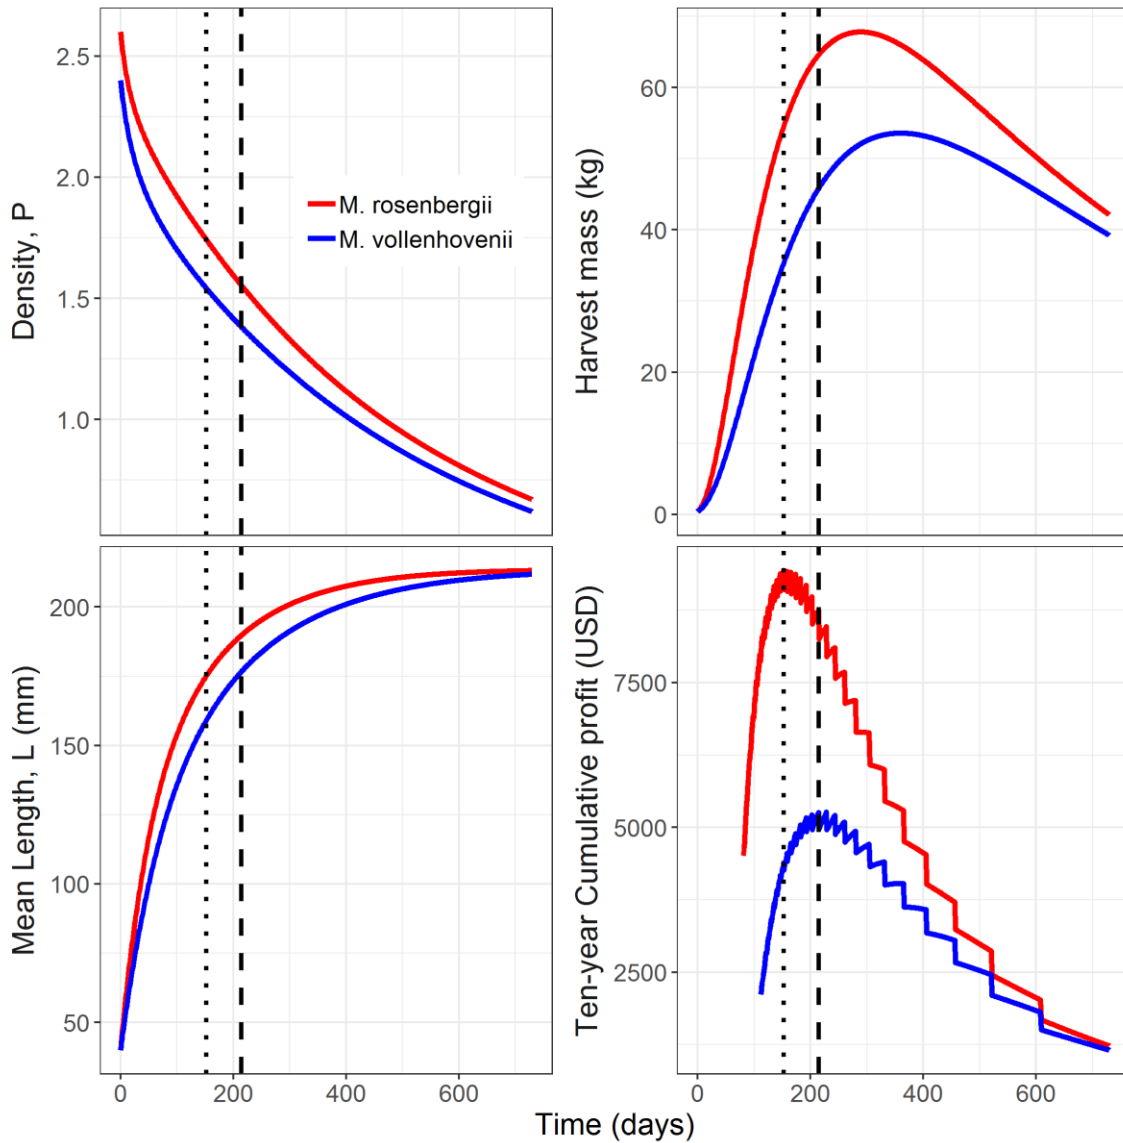

381

382 **Figure 2:** Prawn aquaculture model dynamics. Two-year aquaculture cycles for, *M. rosenbergii* (red  
383 lines) and *M. vollenhovenii* (blue lines) under optimal management showing how prawns grow in  
384 length over time (bottom-left), but decrease in density (top-left). This leads to a single peak in  
385 harvest mass (top-right), but harvesting actually occurs prior to the peak in order to maximize ten-  
386 year cumulative profits (bottom-right) by sacrificing profit-per-cycle for completing more  
387 aquaculture cycles. Vertical dashed lines indicate time at which harvest would occur for each species  
388 (small dashes - *M. rosenbergii*, large dashes - *M. vollenhovenii*). Here, following (19), we set the cost  $c$   
389 for a juvenile prawn to \$0.10 with  $L_0 = 40\text{mm}$  ( $\sim 0.35\text{g}$  per juvenile prawns) and selling price  
390  $p = \$12/\text{kg}$ . Other parameters set as in Table 1.

391

392 The surface of values  $(P_0, T, CP^{sp}(P_0, T, T_{max}))$  for each species is shown in Figure 3. As  
393 expected, profits associated with aquaculture of the faster growing *M. rosenbergii* are higher.  
394 Considering parametric uncertainty, the peak estimate of median cumulative profit for *M.*  
395 *rosenbergii* occurs at  $P_0 = 2.9 Pm^{-2}$  and  $T_{opt}^{ros} = 173 \text{ days}$  (IQR: 146 – 192) , producing  
396  $CP_{opt}^{ros} = \$5364$  ( $\$3192 - \$8111$ ) per  $1,000 m^2$  enclosure. The same estimates for  
397 *M. vollehovenii* are  $P_0 = 2.5 Pm^{-2}$  ,  $T_{opt}^{vol} = 260 \text{ days}$  (228 – 331) , and  $CP_{opt}^{vol} =$   
398  $\$1738$  ( $\$704 - \$3394$ ). Additional outputs from the aquaculture model that describe stock  
399 structure and aquaculture performances at optimal management are reported in Table 1.  
400

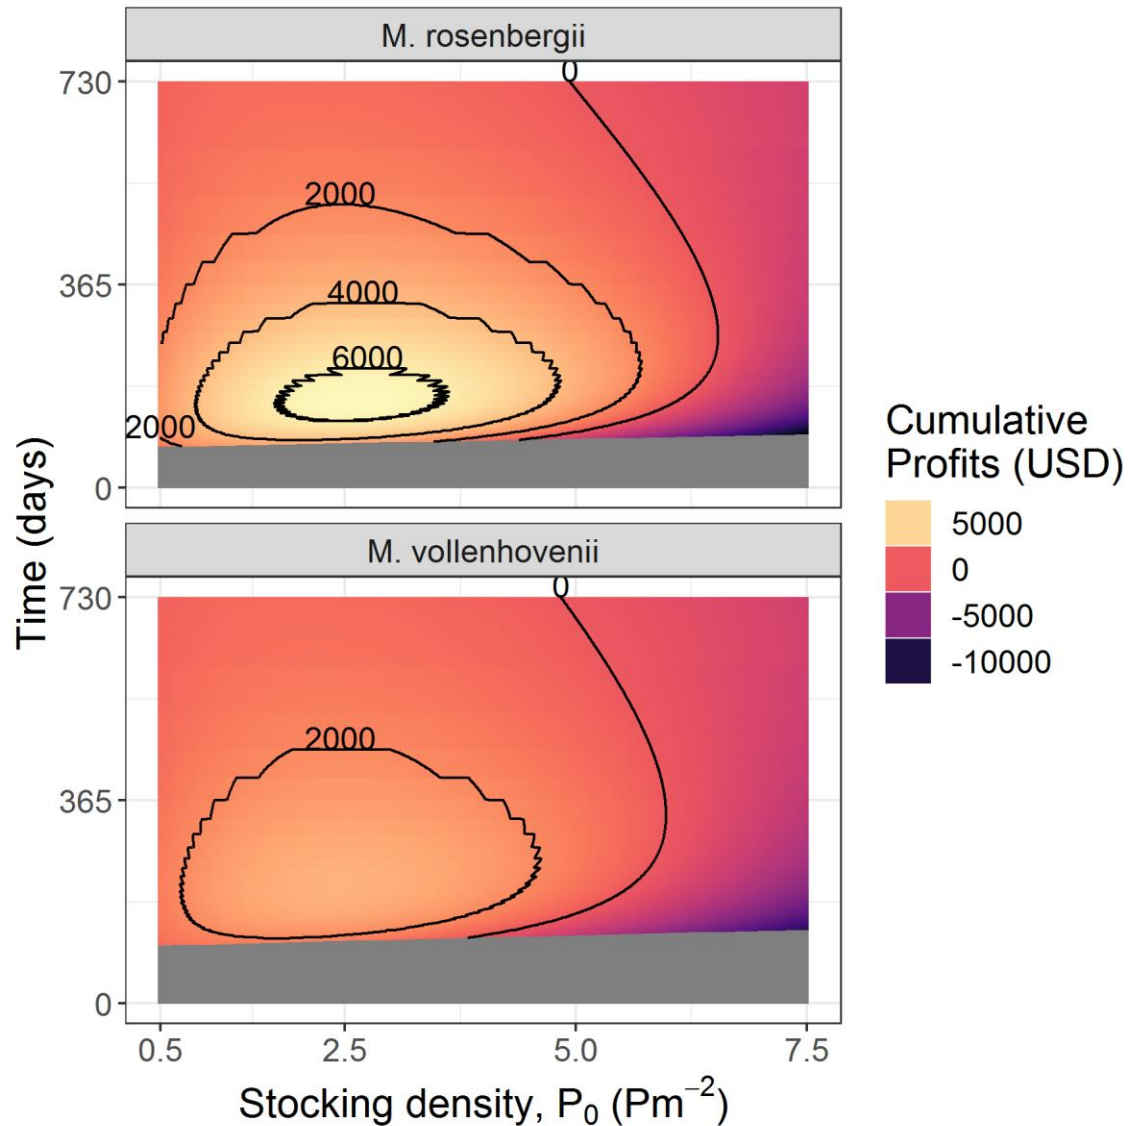

401

402 **Figure 3:** Grid search to identify optimal management decisions for each prawn species. Cumulative  
403 profits ( $CP^{sp}$ ) generated by the aquaculture model for each species across a range of potential  
404 stocking densities ( $P_0$ ) and harvest times ( $T$ ) are shown. Grey regions indicate regions where  
405 harvesting is not feasible due to prawns not having reached sufficient marketable size (30g).  
406 Contours indicate regions of  $CP^{sp}$  corresponding to the labeled value in 2018 USD.

407

408 **Table 1:** Optimal stocking and harvesting parameters for each prawn species reported as median  
 409 (interquartile range).

| <b>Parameter</b>                 | <b>Definition</b>                | <b><i>M. vollehovenii</i></b> | <b><i>M. rosenbergii</i></b> |
|----------------------------------|----------------------------------|-------------------------------|------------------------------|
| $P_{0opt}^{sp}$                  | Optimal stocking density         | $2.4 Pm^{-2}$                 | $2.6 Pm^{-2}$                |
| $L_0$                            | Stocking size of juveniles       | 40mm                          | 40mm                         |
| $T_{opt}^{sp}$                   | Optimal harvest time             | 260 days<br>(228 - 331)       | 165 days<br>(146 - 192)      |
| $L(T_{opt}^{sp})$                | Mean length at harvest           | 167mm<br>(161 - 175)          | 167mm<br>(161 - 174)         |
| $P(T_{opt}^{sp})$                | Prawns harvested                 | 1056<br>(850 - 1236)          | 1559<br>(1434 - 1662)        |
| $Y(T_{opt}^{sp}, P_{0opt}^{sp})$ | Commercial yield per harvest     | 28 kg<br>(21 - 36)            | 41 kg<br>(34 - 49)           |
| $n^{sp}$                         | Number of cycles in 10 years     | 14<br>(11 - 16)               | 22<br>(19 - 25)              |
| $CP_{opt}^{sp}$                  | Cumulative profits over 10 years | \$1891<br>(-\$856 - \$3486)   | \$5403<br>(-\$3380 - \$8075) |

410

411

## 412 **Integrated aquaculture epidemiologic model**

413 Simulation of the integrated model reveals comparable performance of prawn  
414 intervention strategies to MDA strategies. As in previous analyses <sup>7,15</sup>, annual mass drug  
415 administration alone produces a pattern of gradually decreasing worm burden over time  
416 characterized by repeated rebound in infection following MDA (Fig 4A, purple line). The  
417 prawn-only intervention causes mean worm burden to gradually decline towards 0,  
418 eventually reducing worm burden to comparable levels by year 10 (Fig 4A, blue line). Finally,  
419 the combined MDA and prawn intervention leads to a rapid decline in mean worm burden  
420 that nearly reaches 0 by year 10 (Fig 4A, gold line).

421 These patterns can mostly be explained by the underlying snail infection dynamics. Under  
422 MDA intervention, the snail population persists through repeated rounds of MDA and even  
423 increases due to the reduced influence of infection (Fig 4B). Most importantly, a population  
424 of infected snails is able to sustain transmission—albeit at lower levels—even as adult worms  
425 are removed from the treated human population by MDA (Fig 4B). Interventions in which  
426 prawns are introduced at profit-optimal densities produce rapid declines in the snail  
427 population that heavily reduce this environmental reservoir of transmission (Fig 4C).  
428 Extirpation of the entire snail population is prevented due to the assumption of a Holling's  
429 type III functional response and immigration from an unaffected reservoir population (see  
430 Fig S3 for snail infection dynamics without immigration and under a Holling's type II  
431 functional response), but transmission is effectively halted due to near elimination of the  
432 infected snail population (Fig 4C). This heavy reduction in transmission coupled with the  
433 benefits of MDA translates to near elimination of the parasite by year 10. Regardless of the  
434 intervention, ceasing efforts to control transmission after 10 years results in rapid returns to  
435 pre-intervention snail populations and community-level mean worm burdens (Fig 4A-C).

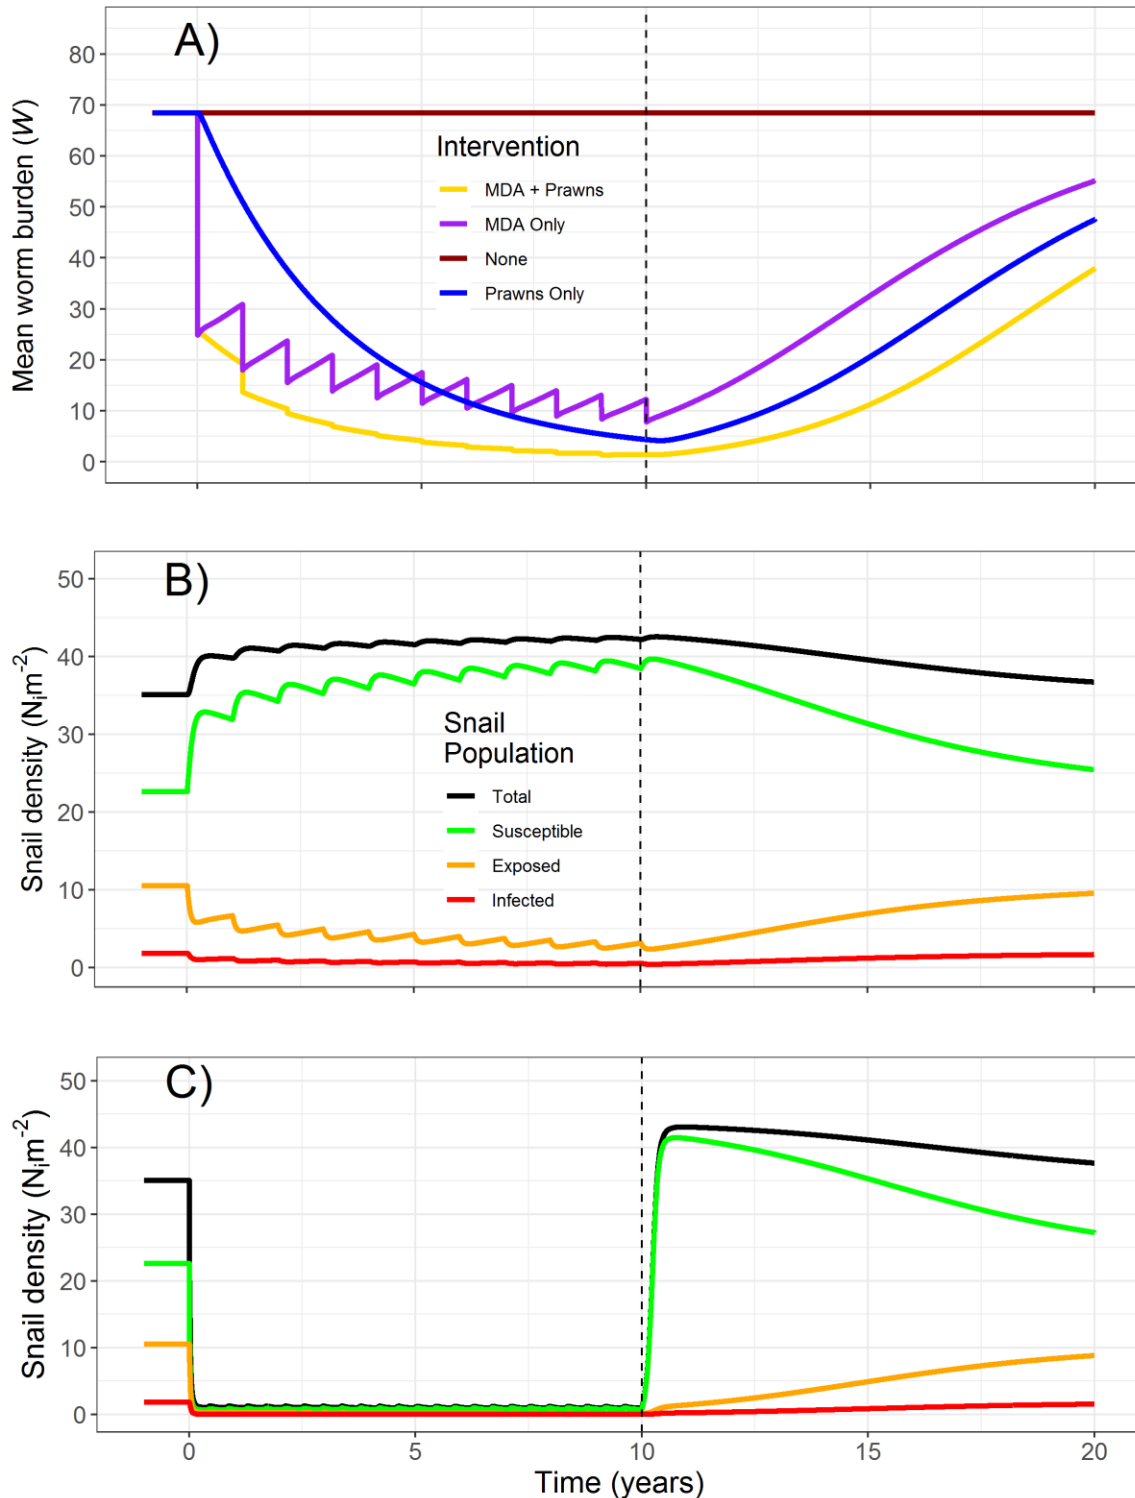

436

437

438

439

440

441

442

**Figure 4:** Outputs of the integrated model under different intervention scenarios implemented over ten years followed by ten years of no intervention. Worm burden trajectories under no intervention (red), annual MDA only (purple), prawn stocking of *M. rosenbergii* under optimal management (blue), and both annual MDA and prawn stocking (gold) (A); snail infection dynamics under MDA only intervention (B); and snail infection dynamics under prawn stocking interventions (C). Outputs from *M. volenhovenii* interventions not shown as they approximately mirror those of *M. rosenbergii*.



443 Comparison of total DALYs lost over ten year simulation periods under each intervention  
444 shows comparable performance of the prawn only intervention to MDA and substantial  
445 additional DALYs averted when combining MDA with prawn intervention. Without  
446 intervention a median 324 (IQR: 119 – 502) DALYs are lost to *S. haematobium* infection.  
447 Annual MDA and profit-optimal stocking of prawns perform comparably with 160 (IQR: 54 –  
448 285) total DALYs lost with annual MDA and 184 (IQR: 70 – 294) total DALYs lost with profit-  
449 optimal prawn stocking; representing 51% and 43% DALYs averted, respectively. Integrated  
450 interventions utilizing both MDA and prawn stocking reduce median DALYs lost to 83 (IQR:  
451 30 – 137), representing a 74% reduction in *S. haematobium* related disability.

#### 452 **Sensitivity Analyses**

453 Substantial sensitivity analyses reveal that profitability of the prawn aquaculture system  
454 and reductions in schistosomiasis burden associated with prawn introductions are robust to  
455 model assumptions and parameters (Figs S1 and S2). The addition of fixed costs associated  
456 with each aquaculture cycle and additional sources of mortality reveal aquaculture of *M.*  
457 *rosenbergii* remains profitable with fixed costs of up to \$550 per cycle (Fig S1) and mortality  
458 rates up to 5.2 times higher than the baseline estimate (Fig S2). Aquaculture of *M.*  
459 *vollenhovenii* remains profitable with fixed costs of up to \$400 per cycle (Fig S1) and  
460 mortality rates up to 3.6 times higher than the baseline estimate (Fig S2). Global sensitivity  
461 analysis using LHS-PRCC shows that the parameters of the VBGE that govern prawn growth  
462 dynamics ( $L_{\infty}, \kappa$ ) and parameters governing estimates of discounted profits ( $\delta, p$ ) are most  
463 correlated with 10-year cumulative profits (Fig 5B)

464 Exploration of snail infection dynamics under prawn interventions also reveals that the  
465 Holling's type III functional response and the inclusion of snail migration represent  
466 conservative structural model assumptions. Figure S3 shows that snail extirpation is only  
467 possible when both of these assumptions are relaxed. Parameters governing snail predation

468 by prawns ( $\epsilon, n$ ) are also shown to have moderate influence on estimates of 10-year  
469 cumulative DALYs lost (Fig 5A).

470 Key outcomes from the epidemiologic model including equilibrium estimates of infected  
471 snail density ( $I$ ) and mean worm burden ( $W$ ) and of DALYs lost over 10-year intervention  
472 periods is mostly influenced by epidemiologic parameters, rather than parameters governing  
473 prawn population or predation dynamics (Fig 5A & 5C). We also compared parameter sets in  
474 which the MDA only intervention was superior to the prawn only intervention in terms of  
475 DALYs averted. We find that the MDA only intervention leads to more DALYs averted when  
476 the coverage and efficacy are high, while the prawn-only intervention performs better when  
477 the snail population carrying capacity ( $K$ ) is higher (Fig S4).

478

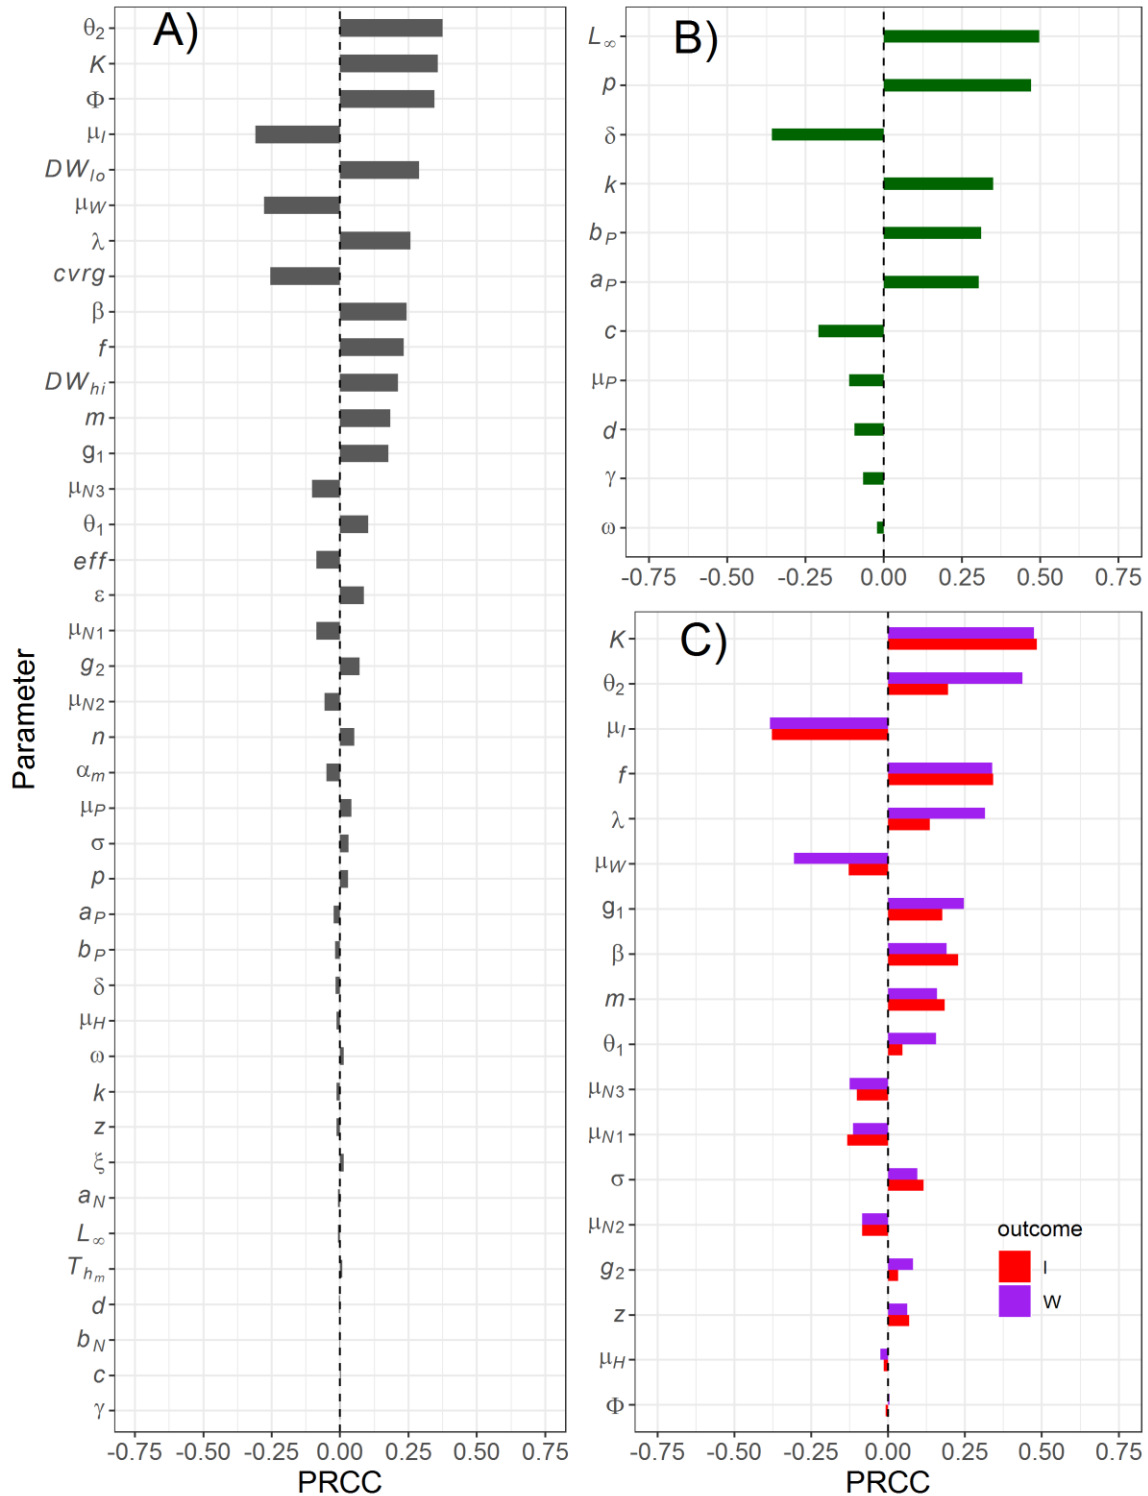

479  
480  
481  
482  
483  
484  
485

**Figure 5:** Sensitivity of key model outcomes to model parameters assessed with LHS-PRCC. Sensitivity to all parameters of DALYs lost following 10 years of combined MDA and prawn intervention (A), cumulative 10-year profit sensitivity to prawn aquaculture parameters (B), and sensitivity of mean worm burden and equilibrium infected snail density to epidemiologic parameters (C). Parameter definitions and baseline values can be found in supplementary tables 1-3.

486 **Discussion**

487 Small-scale, extensive prawn aquaculture such as that considered here offers a profitable  
488 and sustainable method to improve food production, reduce schistosomiasis burdens, and  
489 increase revenues for small-scale subsistence farmers, especially when paired with ongoing  
490 efforts such as rice cultivation <sup>25</sup>. In areas of high food insecurity, malnutrition, and endemic  
491 schistosomiasis—conditions which reinforce each other and often result in “poverty traps”  
492 <sup>52,53</sup>—an integrated system of prawn aquaculture may be a solution for co-benefits of disease  
493 control and sustainable development.

494 Our results are consistent with an increasing body of evidence that consumption of snails  
495 by predator species such as *Macrobrachium* prawns can be an effective method for combating  
496 schistosomiasis transmission to people <sup>14,15,54</sup>. Specifically, by targeting the environmental  
497 reservoir of schistosome parasites, prawns can reduce reinfection rates that plague MDA  
498 campaigns in high transmission settings. By deploying prawn aquaculture with MDA,  
499 effective control—in which the schistosome parasite is suppressed in both human hosts and  
500 intermediate host snails—can be achieved.

501 We also show that such prawn interventions combined with established extensive  
502 aquaculture methods can be profitable if carefully managed. Drawing on economic studies of  
503 existing aquaculture practices <sup>19,33</sup>, we develop—to our knowledge—the first dynamic model  
504 of prawn aquaculture to investigate optimal management practices. The model suitably  
505 simulates prawn stocking in a large water contact site or rice paddy, and the length of optimal  
506 cycles coincides with typical rice harvesting timelines <sup>25</sup>. We find that this system produces  
507 short- and long-term profits, implying the potential for a sustainable, community-driven  
508 intervention, given the right capital investment and incentive programs.

509 Under optimal management, extensive aquaculture of either *M. rosenbergii* or *M.*  
510 *vollenhovenii* leads to both profits and reductions of the snail population. The optimal

511 stocking densities of each species are above the potential threshold of approximately  $2 Pm^{-2}$   
512 necessary for local snail extirpation as identified in previous work <sup>15</sup>, though our conservative  
513 inclusion of snail migration and a Holling's type III functional response restricts such an  
514 outcome in this analysis.

515 Achieving these stocking densities may be challenging in sub-Saharan Africa where >90%  
516 of the global burden of schistosomiasis is found <sup>23</sup> and where the proposed intervention is  
517 likely to provide the most benefit. More than 50 years of domestication of *M. rosenbergii* has  
518 established protocols for ideal rearing and management of aquaculture efforts with this  
519 species <sup>18,19</sup>, whereas similar protocols for the African native *M. vollenhovenii* are still under  
520 development. Profits appear to be highly sensitive to parameters that regulate prawn growth,  
521 meaning continued research and development into *M. vollenhovenii* aquaculture may  
522 eventually provide comparable profits to *M. rosenbergii*. However, in the short term, all male  
523 stocking of *M. rosenbergii* may be a superior strategy.

524 This strategy of stocking the non-native *M. rosenbergii* in coastal regions where it is non-  
525 native should be approached with caution to avoid the establishment of an alien population  
526 with potentially unintended ecological consequences on local biodiversity. Establishment of  
527 non-GMO aquaculture biotechnologies for either all-male <sup>55-57</sup> or all-female <sup>58</sup> populations  
528 suggest possible strategies to prevent invasions. Moreover, recent laboratory experiments  
529 (Savaya-Alkalay et al. submitted) have ruled out the possibility of cross-fertilization between  
530 mature female *M. vollenhovenii* and male *M. rosenbergii*, demonstrating that male-only  
531 progeny of *M. rosenbergii* may be safely used for extensive aquaculture and schistosomiasis  
532 control in western Africa where *M. rosenbergii* is non-native.

533 Extensive sensitivity analyses reveal that key model outcomes including profit generated  
534 by the aquaculture portion of the model and DALYs lost from the integrated model are robust  
535 to key parameters that govern profit estimation and the influence of prawn interventions on

536 DALYs lost. The prawn aquaculture model is most sensitive to parameters governing somatic  
537 growth, which have been estimated from available literature, and supported by expert  
538 opinion <sup>28,32</sup>. This finding also suggests that if stock improvement or improvements in  
539 husbandry practices can increase average prawn condition or size, i.e. by supplementing  
540 feeds, further increases in profit may be possible. Selective harvesting methods that only  
541 remove market-size prawns, leaving the remaining stock to continue to grow, may also  
542 improve aquaculture performance.

543 Optimal aquaculture practices are also sensitive to the market price of adult prawns and  
544 the stocking cost of juvenile prawns, implying that optimal management may be influenced  
545 by fluctuations in market factors that may influence price and cost of harvested and stocked  
546 prawns. Profit generated from selling harvested prawns is based on reasonable assumptions  
547 of prices in premium markets, though the actual selling price in subsistence economies might  
548 be lower and contingent on market access and local demand. However, the fixed cost  
549 sensitivity analysis demonstrates profitability is possible even with substantial additional  
550 costs associated with prawn stocking, and profitability persists across a wide range of  
551 stocking densities for each species. These results together assuage concerns that such  
552 vagaries of the market would impair the success of the proposed system and suggest that  
553 prawn aquaculture should be economically viable even under non-optimal management  
554 densities.

555 Additional sources of mortality could result from declines in water quality caused by  
556 prawn stocking, disease outbreaks, or predation by waterbirds, fish, amphibians or reptiles.  
557 We demonstrate that extensive aquaculture is still profitable with mortality rates as high as  
558 five times greater than natural mortality. Barring catastrophic events, this demonstrates that  
559 the proposed system should be resilient to such perturbations. Therefore, further field work  
560 is required to assess prawn life expectancy, escapement rate, growth performances, changes

561 in water quality, and potential changes in human behavior which might affect either  
562 aquaculture performances and/or snail abundance, transmission rates, and epidemiologic  
563 outcomes.

564 Prawn predation of the snail population as modeled here is also based on a number of  
565 assumptions including the Holling's type III functional response and the prawn attack rate  
566 penalty. We consider the type III functional response a conservative estimate of the  
567 relationship between prawn predation and snail density as it does not allow for the potential  
568 extirpation of the snail population. We also test a wide range of attack rate penalties as we  
569 identified no prior estimates of prawn predation efficiency in non-laboratory settings, and  
570 find that effective control is feasible even when increasing this parameter by an order of  
571 magnitude (implying a substantially reduced attacked rate).

572 Regarding schistosomiasis transmission dynamics, recent findings suggest non-  
573 linearities in the human-to-snail force of infection may decrease the efficacy of MDA and lead  
574 to faster post-MDA rebounds of schistosomiasis <sup>59</sup>. While this may alter the effects of MDA in  
575 our simulations, we believe it strengthens the argument for strategies that explicitly target  
576 the intermediate host snail population, such as the prawn intervention proposed here.  
577 Another recent finding suggests that snail control can actually lead to increased human risk  
578 of *Schistosoma* infection if the snail population is limited by resource competition prior to  
579 "weak" control efforts <sup>60</sup>. In this scenario, remaining snails with higher per-capita resource  
580 availability may produce more cercariae. Given the large magnitude of snail reductions at the  
581 proposed prawn densities modeled here—even given the conservative Holling's III functional  
582 response—we believe this effect is unlikely in our scenarios. Finally, our model lacks  
583 seasonality, which would likely affect both schistosomiasis transmission and prawn growth  
584 as e.g. temperature and rainfall fluctuate through the year, especially in sub-tropical and near  
585 temperate regions where schistosomiasis is still endemic, such as in northern Africa <sup>61,62</sup>.

586           This bioeconomic analysis shows that an integrated intervention strategy that utilizes  
587 both MDA and a profitable prawn aquaculture system can successfully control  
588 schistosomiasis while generating profit. Since the intervention is driven by a profitable  
589 business model, it may be sustainable purely through market incentives, and thereby reduce  
590 the need for external support from donors or public health agencies. Subsidies are only likely  
591 to be necessary in the event that *M. rosenbergii* aquaculture is not suitable for the region and  
592 obtaining large quantities of *M. vollehovenii* juveniles is infeasible or expensive. Research  
593 and development for this system is indeed ongoing in Senegal, which will aid future analyses  
594 of the effectiveness and feasibility of this promising integrated strategy.



595 **Data Availability**

596 All data and code used to conduct this analysis are provided as a supplementary file and are  
597 freely available at [https://github.com/cmhoove14/Prawn\\_fisheries\\_Public\\_health](https://github.com/cmhoove14/Prawn_fisheries_Public_health)

598 **Acknowledgements**

599 CMH, JVR, GADL, IJJ, AJL, SHS, and JRR were supported by the National Institutes of Health  
600 grant no. R01TW010286 (to JRR and JVR). CMH and JVR were additionally supported in  
601 part by the National Science Foundation Water, Sustainability and Climate grants 1360330  
602 and 1646708 (to JVR), by National Institutes of Health grant no. R01AI125842 (to JVR), and  
603 by the University of California Multicampus Research Programs and Initiatives award MRP-  
604 17-446315 (to JVR). GADL, IJJ, AJL and SHS were additionally funded by a grant from the Bill  
605 and Melinda Gates Foundation (OPP1114050) and by a GDP SEED grant from the Freeman  
606 Spogli Institute at Stanford University. GADL, IJJ, AJL, SHS, and JNS were also supported by  
607 NSF CNH grant #1414102. GADL, SHS, CMH, JVR, JNS, RC, LM and MG were supported also  
608 by NIMBioS through the working group on the Optimal Control of Environmentally  
609 Transmitted Disease. JPS and AR acknowledge funds provided by the Swiss National Science  
610 Foundation, via the project "Optimal control of intervention strategies for waterborne  
611 disease epidemics" (200021-172578/1). CLW was supported by the Michigan Society of  
612 Fellows at the University of Michigan and by a Sloan Research Fellowship from the Alfred P.  
613 Sloan Foundation. RC and LM were also supported by Politecnico di Milano through the  
614 Polisocial Award programme (project MASTR-SLS).

615 **Author information**

616 **Contributions**

617 GADL and SHS conceived the problem and designed the general modelling framework. CMH,  
618 SHS, JK, JVR, and GADL developed the analysis. CMH and JK wrote the simulations scripts. GR  
619 collected field data to parameterize the epidemiologic model. SHS provided experimental  
620 data to parameterize the predation component of the model. JNS provided guidance on profit  
621 estimation of the prawn aquaculture model. AS-A, SC, and AS provided guidance on dynamics  
622 of the aquaculture model. CMH, JK, JNS, JVR, and GADL drafted the manuscript and all authors  
623 contributed to its editing.

624 **Competing interests**

625 The authors declare no competing interests

626

627 *Supplementary Information*

628 **Table S1:** Parameters of the prawn aquaculture model and ranges used in the global sensitivity  
629 analysis

| Parameter         | Value & Units                     | Description                                                            | Source      | Range                                      |
|-------------------|-----------------------------------|------------------------------------------------------------------------|-------------|--------------------------------------------|
| $L_{\infty}$      | 214 mm                            | Maximum length used in von Bertalanffy growth equation                 | 32          | [184, 234]                                 |
| $\kappa$          | $0.0034 \frac{mm}{day}$           | Growth rate of <i>Macrobrachium vollenhovenii</i>                      | 32,63       | [0.0078, 0.012]                            |
|                   | $0.0104 \frac{mm}{day}$           | Growth rate of <i>Macrobrachium rosenbergii</i>                        | 29          |                                            |
| $\gamma$          | $3.5 \times 10^{-6} g^{-1}$       | Density dependent growth reduction                                     | 26          | $[3.5 \times 10^{-6}, 6.5 \times 10^{-6}]$ |
| $a_p$             | 0.00244                           | Allometric parameter for <i>Macrobrachium</i> length-weight conversion | 28          | [0.066, 0.081]                             |
| $b_p$             | 3.55                              | Allometric parameter for <i>Macrobrachium</i> length-weight conversion |             | [3.46, 3.64]                               |
| $\mu_p^{\dagger}$ | $0.0061 \frac{P}{day}$            | Daily prawn mortality rate                                             | 32,63       | [0.0054, 0.012]                            |
| $d$               | -0.382                            | Size-dependent mortality scaling coefficient                           | 31          | [-0.461, -0.289]                           |
| $\omega$          | $5.5 \times 10^{-9} g^{-1}$       | Density dependent mortality factor                                     | 26          | $[7.5 \times 10^{-9}, 3.5 \times 10^{-9}]$ |
| $p$               | $\frac{\$12}{kg}$                 | Price per kg of harvested market-size prawns                           | 33,64,65    | [11, 22]                                   |
| $\delta$          | $\frac{1.99 \times 10^{-4}}{day}$ | Discount rate                                                          | (7% annual) | [3%, 20%]                                  |
| $c^{\dagger}$     | $\frac{\$0.10}{P}$                | Cost of a stocked juvenile prawn                                       | 33          | [0.045, 0.12]                              |

630 † See additional sensitivity analyses below

631

## 632 **Epidemiologic model equations**

$$633 \quad \frac{dN_{S1}}{dt} = \xi N_{S1}^E + f \left( 1 - \frac{N}{K} \right) (N_{S2} + N_{S3} + z(N_{E2} + N_{E3})) - (\mu_1 + g_1 + \psi_{S1}P + \xi + \beta M)N_{S1} \quad (S1)$$

$$634 \quad \frac{dN_{S2}}{dt} = \xi N_{S2}^E + g_1 N_{S1} - \psi_{S2}P - (\mu_2 + g_2 + \xi + \beta M)N_{S2} \quad (S2)$$

$$635 \quad \frac{dN_{S3}}{dt} = \xi N_{S3}^E + g_2 N_{S2} - \psi_{S3}P - (\mu_3 + \xi + \beta M)N_{S3} \quad (S3)$$

$$636 \quad \frac{dN_{E1}}{dt} = \xi N_{E1}^E + \beta M H N_{S1} - \psi_{E1}P - (\mu_1 + g_1 + \xi + \sigma)N_{E1} \quad (S4)$$

$$637 \quad \frac{dN_{E2}}{dt} = \xi N_{E2}^E + \beta M H N_{S2} - \psi_{E2}P - (\mu_2 + g_2 + \xi + \sigma)N_{E2} \quad (S5)$$

$$638 \quad \frac{dN_{E3}}{dt} = \xi N_{E3}^E + \beta M H N_{S3} - \psi_{E3}P - (\mu_3 + \xi + \sigma)N_{E3} \quad (S6)$$

$$639 \quad \frac{dN_{I1}}{dt} = \xi N_{I1}^E + \sigma N_{E1} - \psi_{I1}P - (g_1 + \mu_1 + \mu_I + \xi)N_{I1} \quad (S7)$$

$$640 \quad \frac{dN_{I2}}{dt} = \xi N_{I2}^E + \sigma N_{E2} + g_1 N_{I1} - \psi_{I2}P - (g_2 + \mu_2 + \mu_I + \xi)N_{I2} \quad (S8)$$

$$641 \quad \frac{dN_{I3}}{dt} = \xi N_{I3}^E + \sigma N_{E3} + g_2 N_{I2} - \psi_{I3}P - (\mu_3 + \mu_I + \xi)N_{I3} \quad (S9)$$

$$642 \quad \frac{dW_t}{dt} = \lambda(N_{I1} + \theta_1 N_{I2} + \theta_2 N_{I3}) - (\mu_W + \mu_H)W_t \quad (S10)$$

$$643 \quad \frac{dW_u}{dt} = \lambda(N_{I1} + \theta_1 N_{I2} + \theta_2 N_{I3}) - (\mu_W + \mu_H)W_u \quad (S11)$$

644

## 645 **MDA Implementation and DALYs estimation**

646       The model tracks treated and untreated segments of the population by dividing the  
647 worm burden based on MDA coverage, such that total worm burden is a weighted average  
648 of each population:  $W = cvrgW_t + (1 - cvrg)W_u$ . When MDA is implemented, mean worm  
649 burden in the treated compartment is reduced by  $W_t(1 - eff)$ . We assume the dispersion  
650 parameter of the negative binomial distribution in each population is constant over the  
651 simulation period. To estimate the total number of individuals with heavy and light egg  
652 burdens,  $H_{hi}$  and  $H_{lo}$ , respectively, we first sample  $n = H * cvrg$  draws from a negative

653 binomial distribution with mean  $W_t$  and dispersion,  $\varphi$ , to represent the distribution of adult  
654 worms in the treated segment of the human population. Similarly, we sample  $n = H * (1 -$   
655 *cvrg*) draws from a negative binomial distribution with mean  $W_u$  and dispersion,  $\varphi$ , to  
656 represent the distribution of adult worms in the untreated segment of the human  
657 population. We then convert these individual level adult worm counts, denoted  $W_h$ , to  
658 estimates of egg burden, denoted  $B_h$ , as:  $B_h = 0.5W_h\phi(W_h)\mathcal{E}$  where  $0.5W_h\phi(W_h)$  provides  
659 an estimate of the number of mated female (i.e. egg producing) worms and  $\mathcal{E}$  is an estimate  
660 of *S. haematobium* eggs per 10mL urine per mated adult female worm from [CITE]. With the  
661 full distribution of  $B_h$ , we can then estimate the number of individuals with heavy ( $> 50$   
662 eggs per 10mL urine,  $H_{hi}$ ) and light ( $0 < \text{eggs per 10mL urine} \leq 50$ ,  $H_{lo}$ ) *S. haematobium*  
663 burdens as defined by WHO guidelines and subsequently estimate DALYs as in equation 10.

664 **Table S2:** Parameters of the schistosomiasis epidemiologic model

| Parameter             | Value & Units             | Description                                                                                | Source | Range                                      |
|-----------------------|---------------------------|--------------------------------------------------------------------------------------------|--------|--------------------------------------------|
| $f$                   | $0.26 N_{s1} day^{-1}$    | Per-capita recruitment rate of reproductive snails                                         | 15     | [0.06, 0.36]                               |
| $K$                   | $50 \frac{N}{m^2}$        | Snail population carrying capacity                                                         | 66     | [25, 75]                                   |
| $z$                   | 0.5                       | Proportion of pre-patent snails that reproduce                                             | 40     | [0.25, 1]                                  |
| $\mu_1$               | $\frac{1}{50} day^{-1}$   | Mortality rate of snails in size class 1                                                   |        | [25, 100]                                  |
| $\mu_2$               | $\frac{1}{75} day^{-1}$   | Mortality rate of snails in size class 2                                                   | 67,68  | [50, 125]                                  |
| $\mu_3$               | $\frac{1}{100} day^{-1}$  | Mortality rate of snails in size class 3                                                   |        | [75, 150]                                  |
| $\mu_I$               | $\frac{1}{10} day^{-1}$   | Mortality rate of snails in infection class $I$                                            | 40     | [7, 20]                                    |
| $\xi$                 | $\frac{1}{5} year^{-1}$   | Migration rate of snails                                                                   | 69     | [0, 1]                                     |
| $g_1$                 | $\frac{1}{37} day^{-1}$   | Growth rate of snails in size class 1                                                      | 70     | [20, 60]                                   |
| $g_2$                 | $\frac{1}{62} day^{-1}$   | Growth rate of snails in size class 2                                                      |        | [40, 100]                                  |
| $\sigma$              | $\frac{1}{50} day^{-1}$   | Pre-patent period; transition rate of snails in infection class $E$ to infection class $I$ | 71     | [30, 70]                                   |
| $m^\dagger$           | 0.8                       | Infectious miracidia produced per mated adult female worm                                  |        | [0.5, 1.5]                                 |
| $\beta^\dagger$       | $4 \times 10^{-7}$        | Pre-patent snails produced per infectious miracidia                                        | 15     | $[2.0 \times 10^{-7}, 8 \times 10^{-7}]$   |
| $\lambda^\dagger$     | $7.5 \times 10^{-6}$      | Adult worms produced per infectious cercaria shed by infected snails                       |        | $[5.0 \times 10^{-6}, 1.0 \times 10^{-5}]$ |
| $\theta_1$            | 1.31                      | Increased relative production of infectious cercariae by snails in class $N_{I2}$          | 43     | [1, 5]                                     |
| $\theta_2$            | 7.88                      | Increased relative production of infectious cercariae by snails in class $N_{I3}$          |        | [2, 10]                                    |
| $\varphi$             | 0.08                      | Clumping parameter of the negative binomial distribution                                   | 38     | [0.01, 0.3]                                |
| $\mu_w$               | $\frac{1}{3.3} year^{-1}$ | Mortality rate of adult worms                                                              | 15     | [2, 4]                                     |
| $\mu_H$               | $\frac{1}{60} year^{-1}$  | Mortality rate of humans harboring adult worms                                             |        | [50, 70]                                   |
| $DW_{hi}$             | 0.05                      | Disability weight associated with heavy <i>S. haematobium</i> egg burden                   | 7,72   | [0.03, 0.15]                               |
| $DW_{lo}$             | 0.014                     | Disability weight associated with heavy <i>S. haematobium</i> egg burden                   | 7,72   | [0.003, 0.03]                              |
| $eff$                 | 0.85                      | MDA efficacy                                                                               |        | [0.75, 0.95]                               |
| $cvrg$                | 0.75                      | MDA coverage                                                                               |        | [0.5, 0.95]                                |
| $\mathcal{E}^\dagger$ | 3.6                       | Eggs produced per 10mL urine per mated adult female worm                                   | 73     | [2, 5]                                     |

665 † Units provided in description

666 **Table S3:** Parameters regulating snail predation of snails, linking the aquaculture model to the  
 667 epidemiologic model

| Parameter  | Value & Units | Description                                                                                                          | Source                                                                                               | Range      |
|------------|---------------|----------------------------------------------------------------------------------------------------------------------|------------------------------------------------------------------------------------------------------|------------|
| $a_N$      | 0.19          | Allometric parameter for snail shell width-weight conversion                                                         |                                                                                                      | [0.1, 0.3] |
| $b_N$      | 2.54          | Allometric parameter for snail shell width-weight conversion                                                         |                                                                                                      | [2, 3]     |
| $\alpha_m$ | 0.91          | Parameter to estimate prawn attack rate from prawn-snail biomass ratio                                               | 13                                                                                                   | [0.5, 1.5] |
| $T_{hm}$   | 0.39          | Parameter to estimate prawn handling time from prawn-snail biomass ratio                                             |                                                                                                      | [0.2, 0.5] |
| $n$        | 2             | Exponent of Holling's type III functional response                                                                   | 38                                                                                                   | [1.1, 4]   |
| $\epsilon$ | 10%           | Prawn predation attack rate penalty associated with searching for prey in wildlife rather than laboratory conditions | Estimated as 10% of laboratory-determined rates with wide range investigated in sensitivity analysis | [1, 100]   |

668  
 669

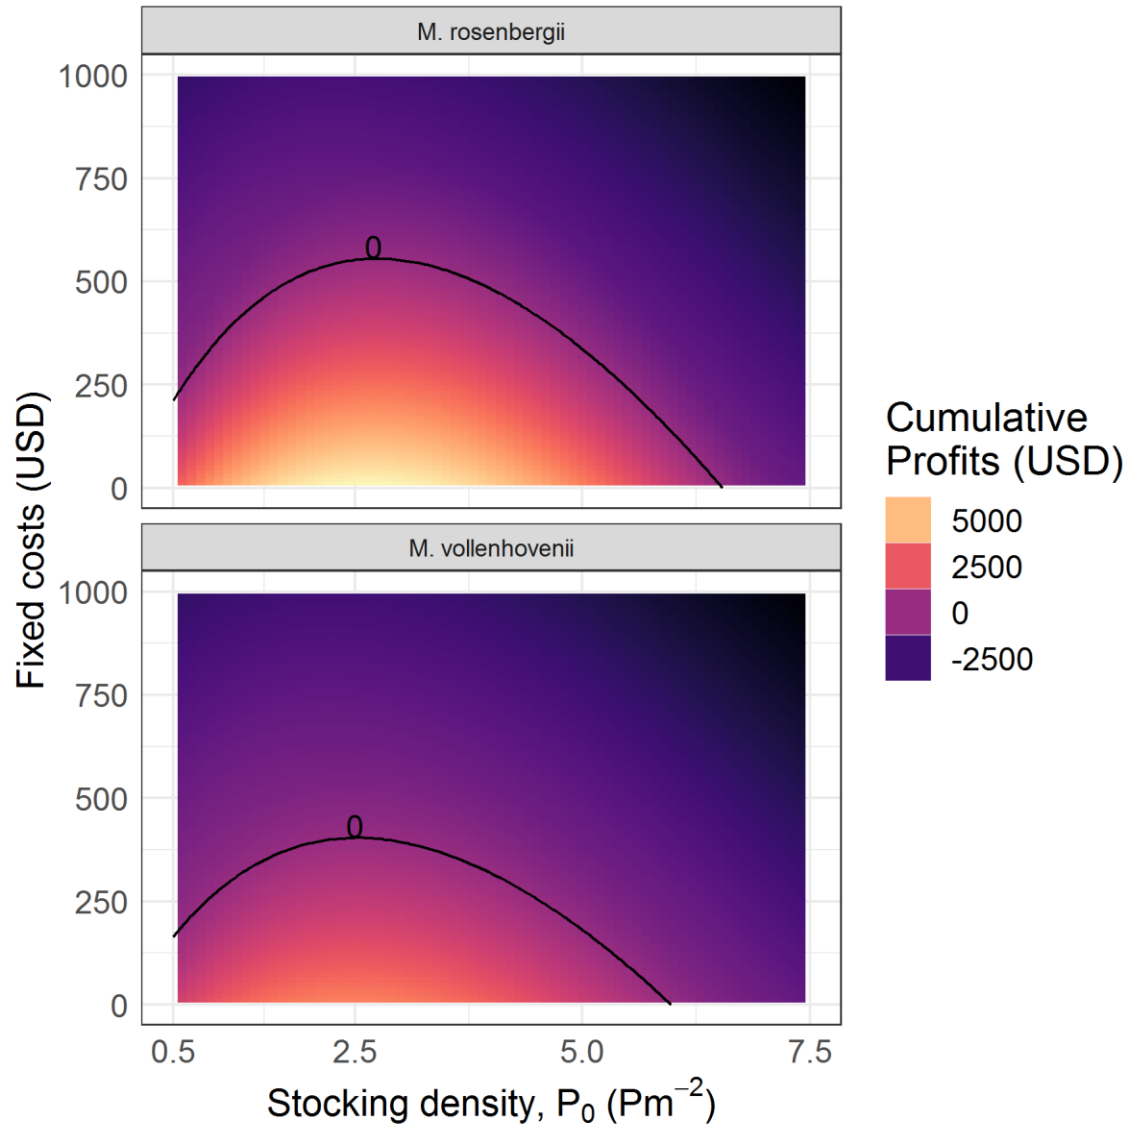

670  
671  
672  
673  
674  
675

**Figure S1:** Sensitivity analysis investigating the influence of fixed costs incurred each aquaculture cycle on profits generated by the prawn aquaculture model. Color indicates the 10-year cumulative profits generated by optimal management with stocking at the density indicated on the x-axis. The black line delineates the maximum boundary of profitability.

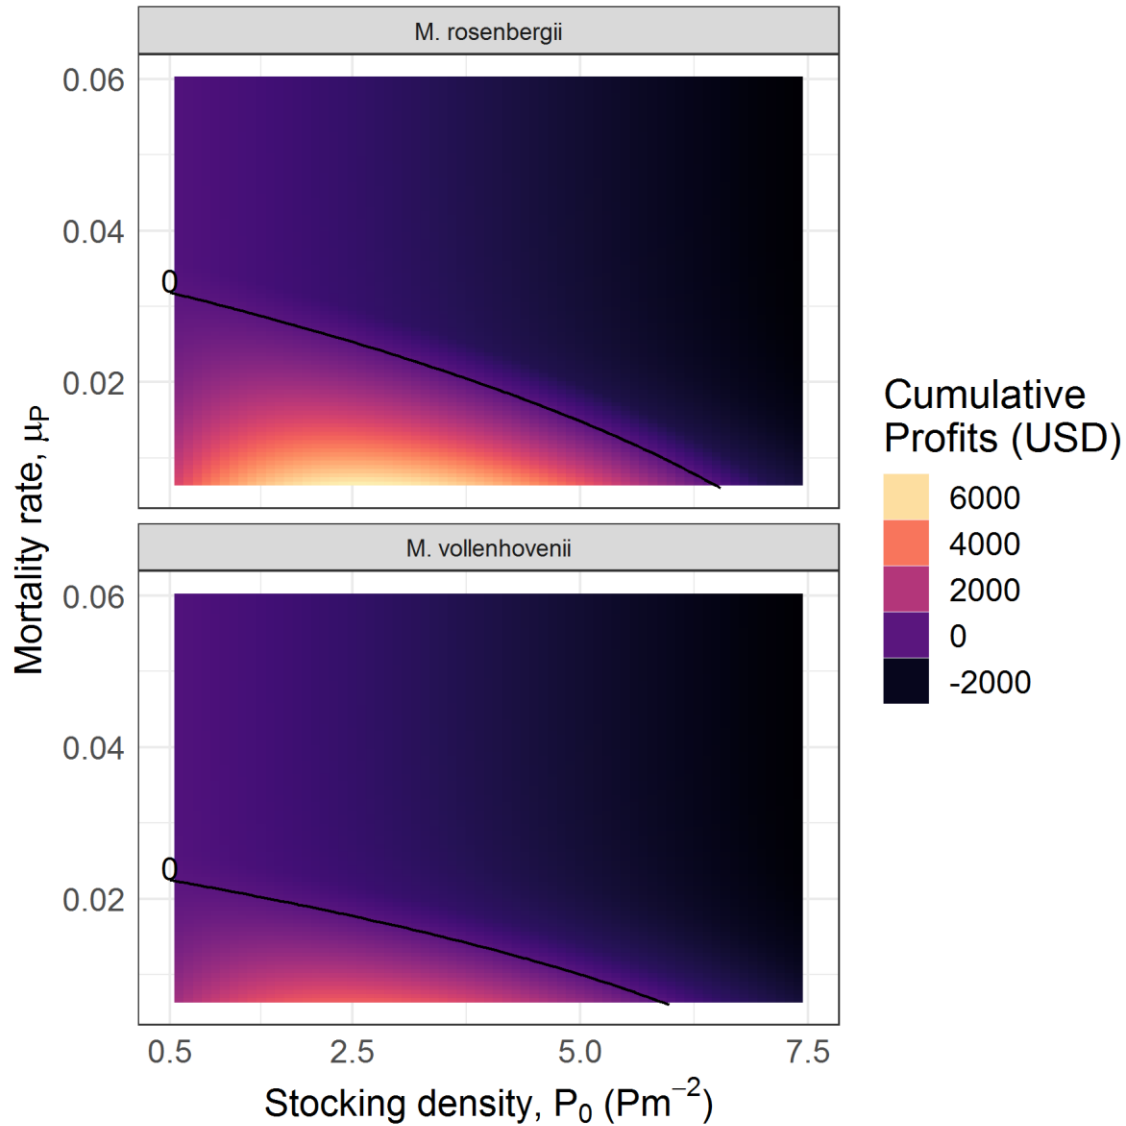

676  
677  
678  
679  
680  
681

**Figure S2:** Sensitivity analysis investigating the influence of increased mortality rates (baseline  $\mu_P = 0.006$ ) on profits generated by the prawn aquaculture model. Color indicates the 10-year cumulative profits generated by optimal management with stocking at the density indicated on the x-axis. The black line delineates the maximum boundary of profitability.



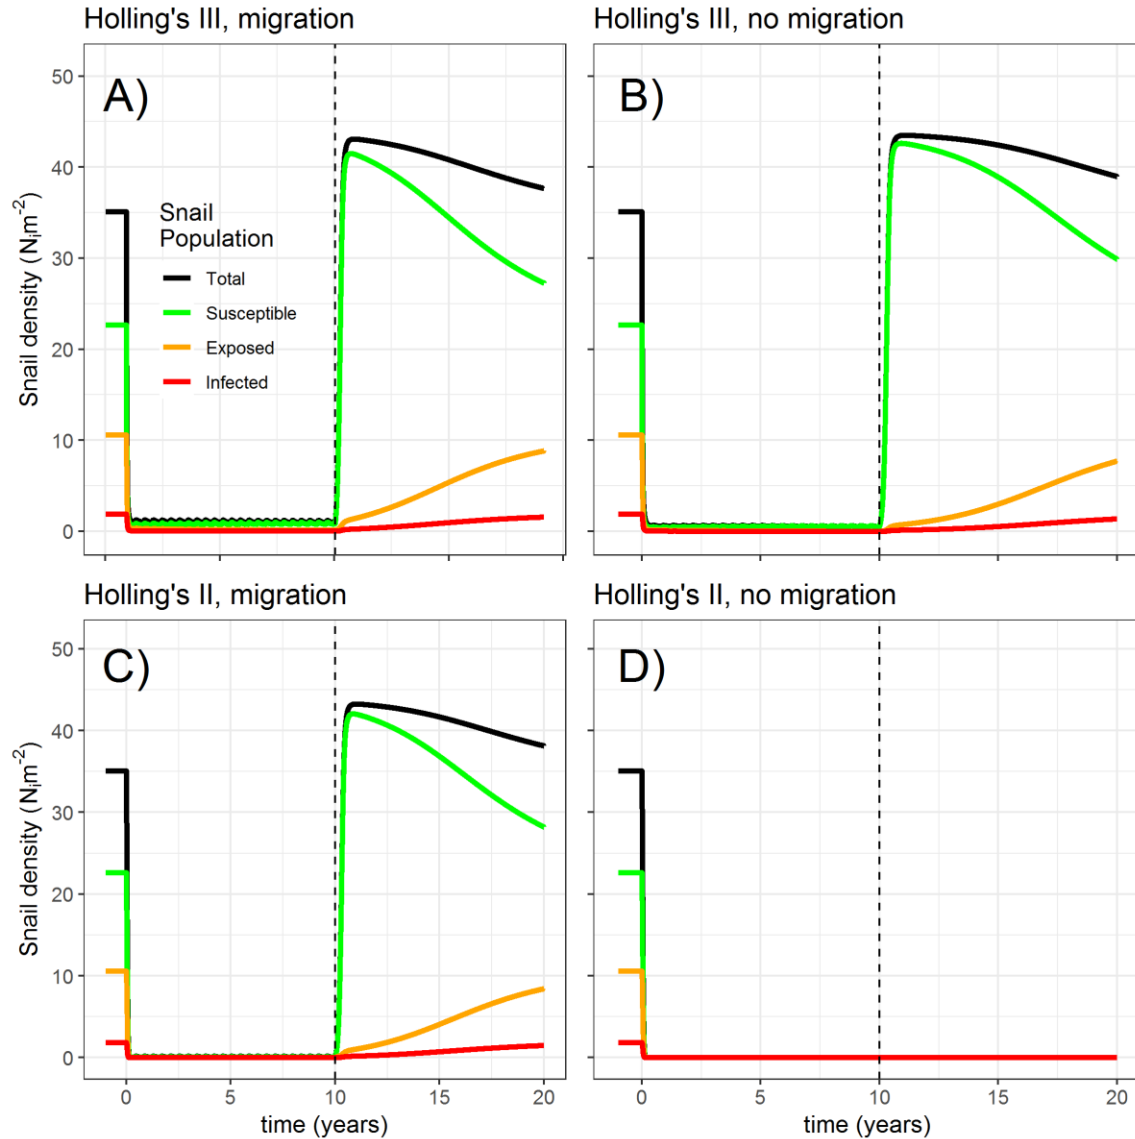

682  
683  
684  
685  
686  
687  
688  
689  
690  
691

**Figure S3:** Sensitivity analysis investigating the influence of the predation functional response and migration on snail infection dynamics. The model is simulated assuming a type III functional response and migration from an external source (A), a type III functional response with no migration (B), a type II functional response with migration (C), and a type II functional response with no migration (D). Simulations indicate that as long as migration is present or predation dynamics follow a type III response (indicating decreased predation rates at low densities due to e.g. prey switching or the presence of prey refugia) the snail population rapidly reestablishes after prawn interventions are discontinued.

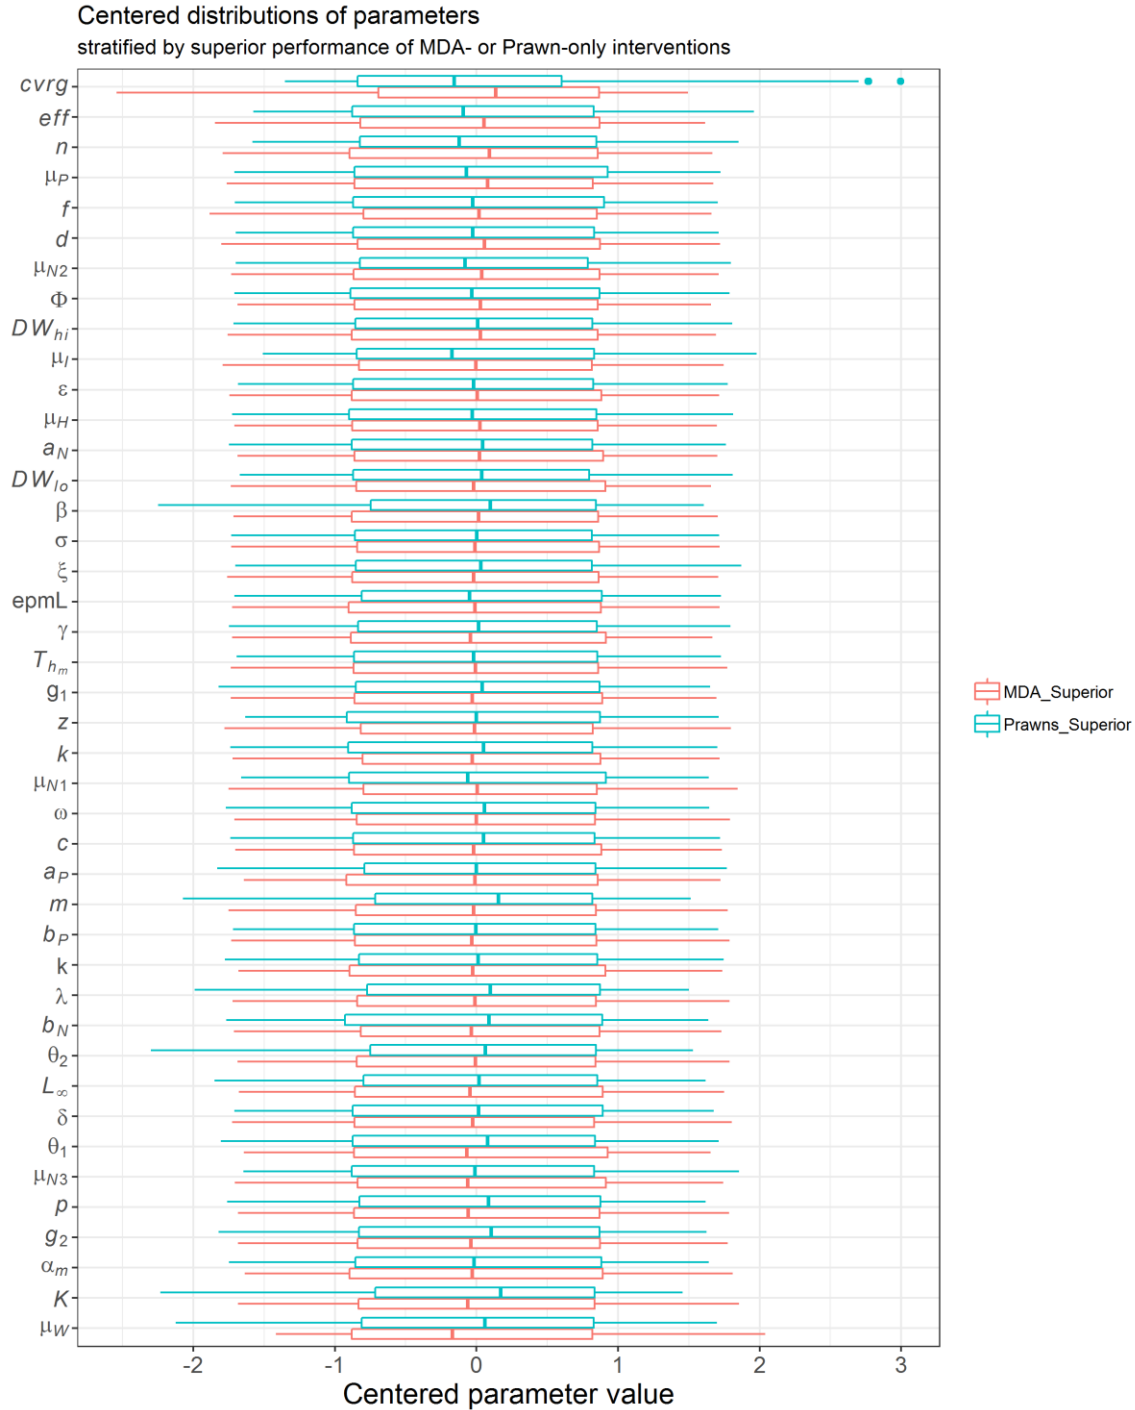

692  
693  
694  
695  
696  
697  
698  
699

**Figure S4:** Centered distributions of model parameters stratified by whether more DALYs were averted in MDA-only or in Prawn-only intervention simulations compared to no intervention simulations. Comparisons show that the MDA intervention tends to perform superior when MDA coverage (*cvrg*) and efficacy (*eff*) are higher and when infected snail and prawn mortality are higher ( $\mu_I$  and  $\mu_P$ , respectively). The prawn intervention performs notably better when the snail population carrying capacity (*K*) is higher.

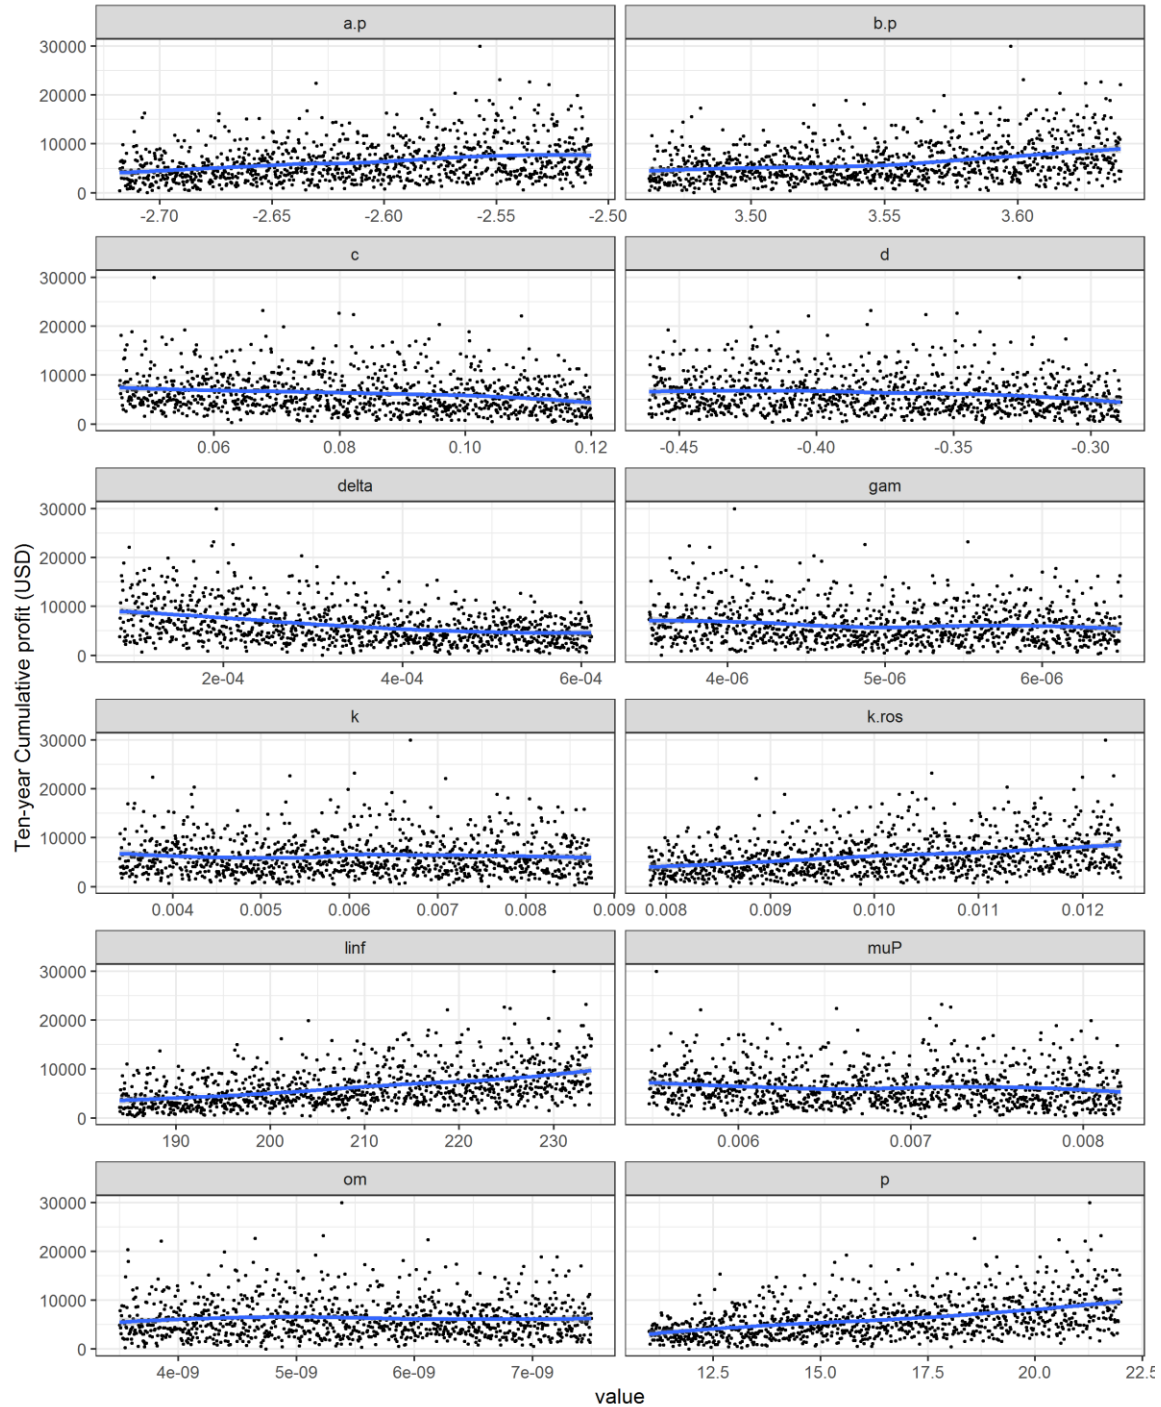

700  
701  
702  
703

**Figure S5:** Scatterplots used to verify monotonicity between parameters of the prawn aquaculture model and estimates of ten year cumulative profits. Blue lines represent loess smoothing.

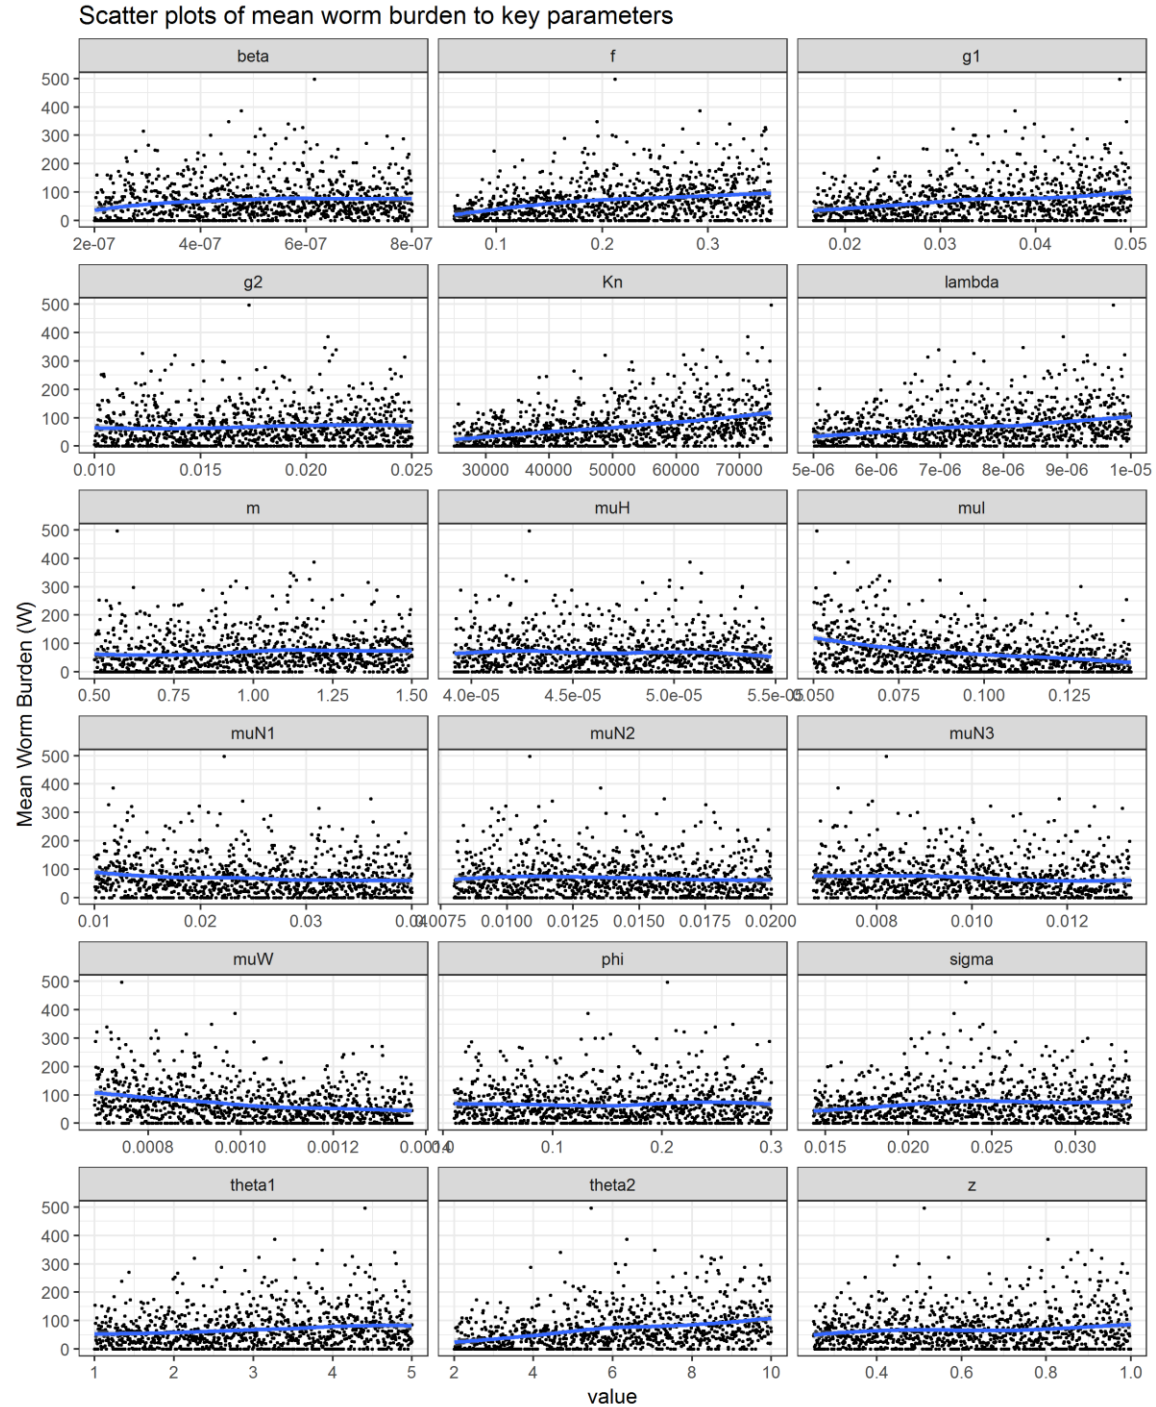

704  
705  
706  
707

**Figure S6:** Scatterplots used to verify monotonicity between parameters of the epidemiologic model and estimates of equilibrium mean worm burden. Blue lines represent loess smoothing.

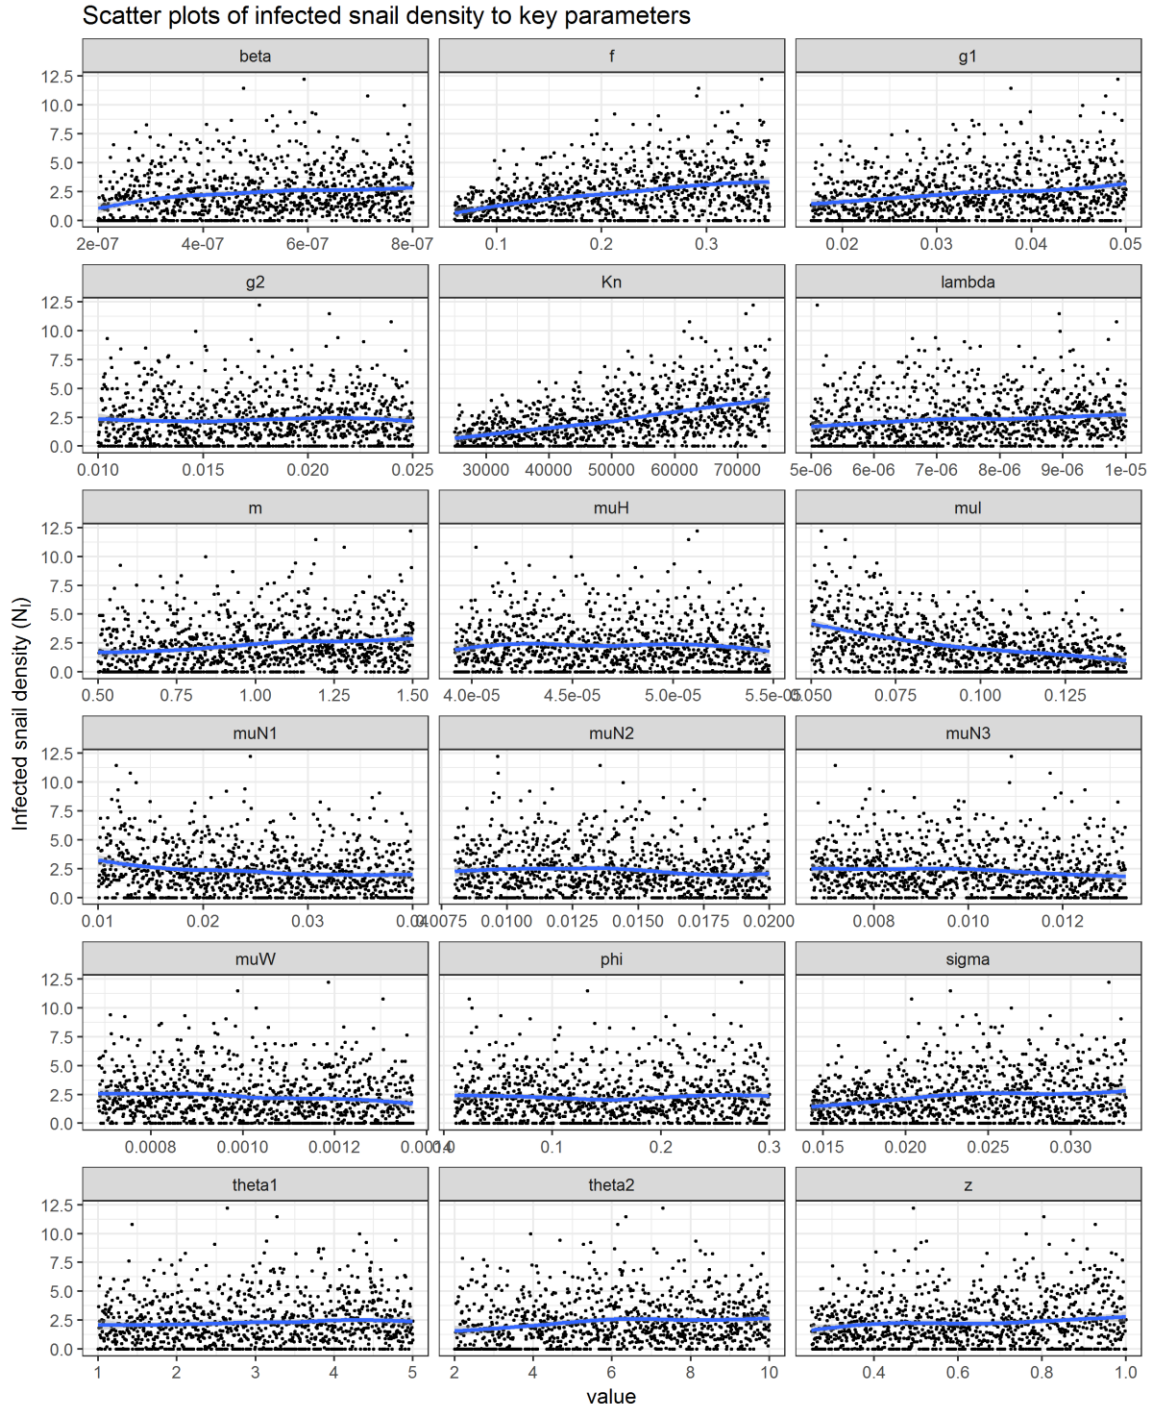

708  
709  
710  
711

**Figure S7:** Scatterplots used to verify monotonicity between parameters of the epidemiologic model and estimates of equilibrium infected snail density. Blue lines represent loess smoothing.

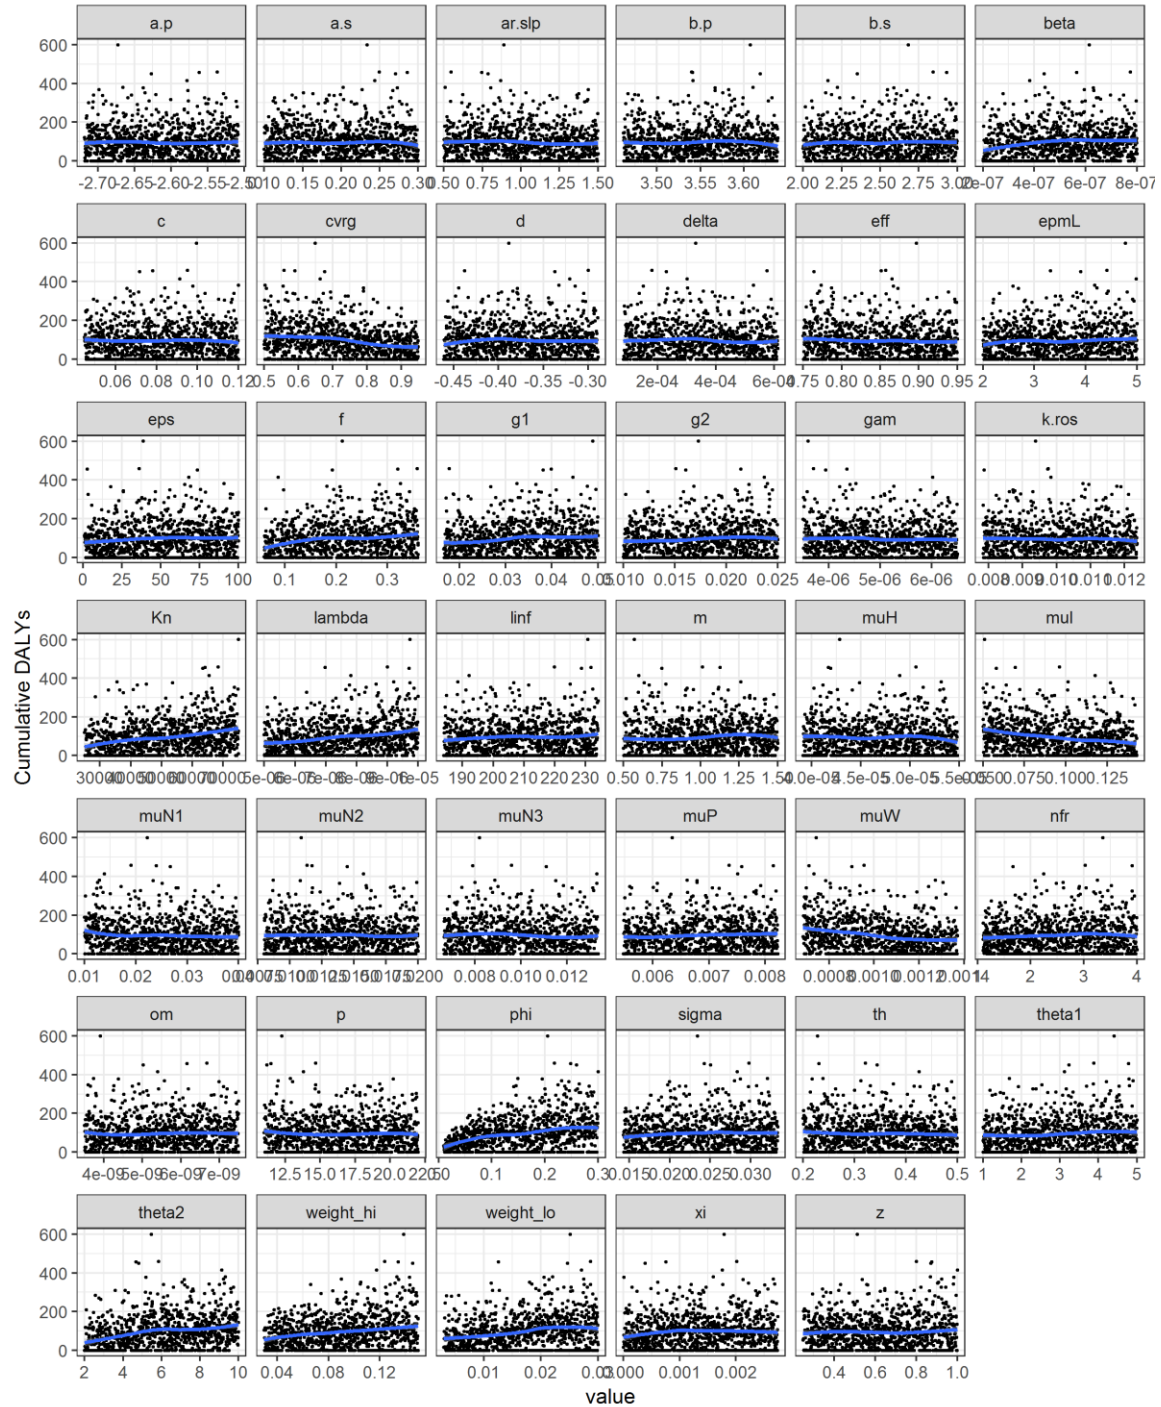

712  
713  
714  
715  
716

**Figure S8:** Scatterplots used to verify monotonicity between parameters of the combined model and estimates of DALYs lost during ten years of integrated MDA and prawn intervention. Blue lines represent loess smoothing.

## 717 *References*

- 718 1. WHO. *Schistosomiasis: progress report 2001–2011, strategic plan 2012–2020*.  
719 (2013).
- 720 2. Lai, Y.-S. *et al.* Spatial distribution of schistosomiasis and treatment needs in  
721 sub-Saharan Africa: a systematic review and geostatistical analysis. *Lancet*.  
722 *Infect. Dis.* **15**, 927–40 (2015).
- 723 3. Steinmann, P., Keiser, J., Bos, R., Tanner, M. & Utzinger, J. Schistosomiasis and  
724 water resources development: systematic review, meta-analysis, and  
725 estimates of people at risk. *Lancet Infect. Dis.* **6**, 411–425 (2006).
- 726 4. Colley, D. G. *et al.* Defining Persistent Hotspots: Areas That Fail to Decrease  
727 Meaningfully in Prevalence after Multiple Years of Mass Drug Administration  
728 with Praziquantel for Control of Schistosomiasis. *Am. J. Trop. Med. Hyg.* **97**,  
729 1810–1817 (2017).
- 730 5. Stothard, J. R. *et al.* Towards interruption of schistosomiasis transmission in  
731 sub-Saharan Africa: developing an appropriate environmental surveillance  
732 framework to guide and to support ‘end game’ interventions. *Infect. Dis.*  
733 *Poverty* **6**, 10 (2017).
- 734 6. Sokolow, S. H. *et al.* Global Assessment of Schistosomiasis Control Over the  
735 Past Century Shows Targeting the Snail Intermediate Host Works Best. *PLoS*  
736 *Negl. Trop. Dis.* **10**, e0004794 (2016).
- 737 7. Lo, N. C. *et al.* Impact and cost-effectiveness of snail control to achieve disease  
738 control targets for schistosomiasis. *Proc. Natl. Acad. Sci. U. S. A.* **115**, E584–  
739 E591 (2018).
- 740 8. King, C. H., Sutherland, L. J. & Bertsch, D. Systematic Review and Meta-analysis  
741 of the Impact of Chemical-Based Mollusciciding for Control of *Schistosoma*  
742 *mansoni* and *S. haematobium* Transmission. *PLoS Negl. Trop. Dis.* **9**, e0004290  
743 (2015).
- 744 9. Andrews, P., Thyssen, J. & Lorke, D. The biology and toxicology of  
745 molluscicides, bayluscide. *Pharmacol. Ther.* **19**, 245–295 (1982).
- 746 10. Dawson, V. K. Environmental Fate and Effects of the Lampricide Bayluscide: a  
747 Review. *J. Great Lakes Res.* **29**, 475–492 (2003).
- 748 11. Murray, C. J. L. *et al.* Disability-adjusted life years (DALYs) for 291 diseases  
749 and injuries in 21 regions, 1990–2010: a systematic analysis for the Global  
750 Burden of Disease Study 2010. *Lancet* **380**, 2197–2223 (2012).
- 751 12. Hofkin, B. V, Hofinger, D. M., Koech, D. K. & Loker, E. S. Predation of  
752 *Biomphalaria* and non-target molluscs by the crayfish *Procambarus clarkii*:  
753 implications for the biological control of schistosomiasis. *Ann. Trop. Med.*  
754 *Parasitol.* **86**, 663–70 (1992).
- 755 13. Sokolow, S. H., Lafferty, K. D. & Kuris, A. M. Regulation of laboratory  
756 populations of snails (*Biomphalaria* and *Bulinus* spp.) by river prawns,  
757 *Macrobrachium* spp. (Decapoda, Palaemonidae): implications for control of  
758 schistosomiasis. *Acta Trop.* **132**, 64–74 (2014).
- 759 14. Mkoji, G. M. *et al.* Impact of the crayfish *Procambarus clarkii* on *Schistosoma*  
760 *haematobium* transmission in Kenya. *Am. J. Trop. Med. Hyg.* **61**, 751–759  
761 (1999).

- 762 15. Sokolow, S. H. *et al.* Reduced transmission of human schistosomiasis after  
763 restoration of a native river prawn that preys on the snail intermediate host.  
764 *Proc. Natl. Acad. Sci. U. S. A.* **112**, 9650–9655 (2015).
- 765 16. Roberts, J. K. & Kuris, A. M. Predation and control of laboratory populations of  
766 the snail *Biomphalaria glabrata* by the freshwater prawn *Macrobrachium*  
767 *rosenbergii*. *Ann. Trop. Med. Parasitol.* **84**, 401–12 (1990).
- 768 17. Islam, M. S. & Wahab, M. A. A review on the present status and management of  
769 mangrove wetland habitat resources in Bangladesh with emphasis on  
770 mangrove fisheries and aquaculture. *Hydrobiologia* **542**, 165–190 (2005).
- 771 18. Food and Agriculture Organization of the United Nations. *Report of the FAO*  
772 *Expert Workshop on the Use of Wild Fish and/or Other Aquatic Species as Feed*  
773 *in Aquaculture and its Implications to Food Security and Poverty Alleviation.*  
774 (Food and Agriculture Organization of the United Nations, 2008).
- 775 19. *Freshwater prawns : biology and farming.* (Blackwell Pub, 2010).
- 776 20. New, M. B., Valenti, W. C. & Wiley InterScience (Online service). *Freshwater*  
777 *prawn culture : the farming of Macrobrachium rosenbergii.* (Blackwell Science,  
778 2000).
- 779 21. Savaya Alkalay, A. *et al.* The Prawn *Macrobrachium vollenhovenii* in the  
780 Senegal River Basin: Towards Sustainable Restocking of All-Male Populations  
781 for Biological Control of Schistosomiasis. *PLoS Negl. Trop. Dis.* **8**, e3060  
782 (2014).
- 783 22. Levy, T. *et al.* All-female monosex culture in the freshwater prawn  
784 *Macrobrachium rosenbergii* – A comparative large-scale field study.  
785 *Aquaculture* **479**, 857–862 (2017).
- 786 23. Hotez, P. J. *et al.* The Global Burden of Disease Study 2010: Interpretation and  
787 Implications for the Neglected Tropical Diseases. *PLoS Negl. Trop. Dis.* **8**,  
788 e2865 (2014).
- 789 24. Balasubramanian, V., Sie, M., Hijmans, R. J. & Otsuka, K. Increasing Rice  
790 Production in Sub-Saharan Africa: Challenges and Opportunities. *Adv. Agron.*  
791 **94**, 55–133 (2007).
- 792 25. Ahmed, N. & Garnett, S. T. Sustainability of Freshwater Prawn Farming in Rice  
793 Fields in Southwest Bangladesh. *J. Sustain. Agric.* **34**, 659–679 (2010).
- 794 26. Ranjeet, K. & Kurup, B. M. Heterogeneous Individual Growth of  
795 *Macrobrachium rosenbergii* Male Morphotypes. *ICLARM Q.* **25**, (2002).
- 796 27. von Bertalanffy, L. A quantitative theory of organic growth (inquiries on  
797 growth laws. II). *Human Biology* **10**, 181–213 (1938).
- 798 28. Lalrinsanga, P. L. *et al.* Length Weight Relationship and Condition Factor of  
799 Giant Freshwater Prawn *Macrobrachium rosenbergii* (De Man, 1879) Based  
800 on Developmental Stages, Culture Stages and Sex. *Turkish J. Fish. Aquat. Sci.*  
801 **12**, 917–924 (2012).
- 802 29. Sampaio, C. M. S. & Valenti, W. C. Growth Curves for *Macrobrachium*  
803 *rosenbergii* in Semi-Intensive Culture in Brazil. *J. WORLD Aquac. Soc.* **27**,  
804 (1996).
- 805 30. Lima, J. de F., Garcia, J. da S. & Silva, T. C. da. Natural diet and feeding habits of  
806 a freshwater prawn (*Macrobrachium carcinus*: Crustacea, Decapoda) in the  
807 estuary of the Amazon River. *Acta Amaz.* **44**, 235–244 (2014).



- 808 31. Lorenzen, K. The relationship between body weight and natural mortality in  
809 juvenile and adult fish: a comparison of natural ecosystems and aquaculture. *J.*  
810 *Fish Biol.* **49**, 627–647 (1996).
- 811 32. Nwosu, F. & Wolfi, M. Population dynamics of the Giant African River prawn  
812 *Macrobrachium vollenhovenii* Herklots 1857 (Crustacea, Palaemonidae) in  
813 the Cross River Estuary, Nigeria. *West African J. Appl. Ecol.* **9**, (2009).
- 814 33. Dasgupta, S. & Tidwell, J. H. A Breakeven Price Analysis of Four Hypothetical  
815 Freshwater Prawn, *Macrobrachium rosenbergii*, Farms Using Data from  
816 Kentucky. *J. Appl. Aquac.* **14**, 1–22 (2003).
- 817 34. Office of Management and Budget. *Discount Rates for Cost-Effectiveness*  
818 *Analysis of Federal Programs.* (2018).
- 819 35. Reed, W. J. OPTIMAL HARVESTING MODELS IN FOREST MANAGEMENT - A  
820 SURVEY. *Nat. Resour. Model.* **1**, 55–79 (1986).
- 821 36. Karp, L., Sadeh, A. & Griffin, W. L. Cycles in Agricultural Production: The Case  
822 of Aquaculture. *Am. J. Agric. Econ.* **68**, 553 (1986).
- 823 37. GUTTORMSEN, A. G. Faustmann in the Sea: Optimal Rotation in Aquaculture.  
824 *Marine Resource Economics* **23**, 401–410 (2008).
- 825 38. Halstead, N. T. *et al.* Agrochemicals increase risk of human schistosomiasis by  
826 supporting higher densities of intermediate hosts. *Nat. Commun.* **9**, 837  
827 (2018).
- 828 39. Lafferty, K. D. & Kuris, A. M. Parasitic castration: the evolution and ecology of  
829 body snatchers. *Trends Parasitol.* **25**, 564–572 (2009).
- 830 40. Mangal, T. D., Paterson, S. & Fenton, A. Effects of Snail Density on Growth,  
831 Reproduction and Survival of *Biomphalaria alexandrina* Exposed to  
832 *Schistosoma mansoni*. *J. Parasitol. Res.* 1–6 (2010).  
833 doi:10.1155/2010/186792
- 834 41. Anderson, R. M. R. M. & May, R. M. R. M. *Infectious Diseases of Humans.* (Oxford  
835 University Press, 1991).
- 836 42. May, R. M. Togetherness among Schistosomes: its effects on the dynamics of  
837 the infection. *Math. Biosci.* **35**, 301–343 (1977).
- 838 43. Chu, K. Y. & Dawood, I. K. Cercarial production from *Biomphalaria alexandrina*  
839 infected with *Schistosoma mansoni*. *Bull. World Health Organ.* **42**, 569–74  
840 (1970).
- 841 44. Holling, C. S. The Components of Predation as Revealed by a Study of Small-  
842 Mammal Predation of the European Pine Sawfly. *Can. Entomol.* **91**, 293–320  
843 (1959).
- 844 45. Lo, N. C. *et al.* Assessment of global guidelines for preventive chemotherapy  
845 against schistosomiasis and soil-transmitted helminthiasis: a cost-  
846 effectiveness modelling study. *Lancet Infect. Dis.* **16**, 1065–1075 (2016).
- 847 46. Beverton, R. J. H. & Holt, S. J. *On the Dynamics of Exploited Fish Populations.*  
848 (Springer Netherlands, 1993). doi:10.1007/978-94-011-2106-4
- 849 47. Zwang, J. & Olliaro, P. L. Clinical Efficacy and Tolerability of Praziquantel for  
850 Intestinal and Urinary Schistosomiasis—A Meta-analysis of Comparative and  
851 Non-comparative Clinical Trials. *PLoS Negl. Trop. Dis.* **8**, e3286 (2014).
- 852 48. Lo, N. C. *et al.* Comparison of community-wide, integrated mass drug  
853 administration strategies for schistosomiasis and soil-transmitted

- 854 helminthiasis: a cost-effectiveness modelling study. *Lancet Glob. Heal.* **3**,  
855 e629–e638 (2015).
- 856 49. Soetaert, K., Petzoldt, T. & Setzer, R. W. Solving Differential Equations in R:  
857 Package deSolve. *J. Stat. Softw.* **33**, 1–25 (2010).
- 858 50. Marino, S., Hogue, I. B., Ray, C. J. & Kirschner, D. E. A methodology for  
859 performing global uncertainty and sensitivity analysis in systems biology. *J.*  
860 *Theor. Biol.* **254**, 178–96 (2008).
- 861 51. Wu, J. *et al.* Sensitivity analysis of infectious disease models: methods,  
862 advances and their application. *J. R. Soc. Interface* **10**, 20121018 (2013).
- 863 52. Ngonghala, C. N. *et al.* Poverty, Disease, and the Ecology of Complex Systems.  
864 *PLoS Biol.* **12**, e1001827 (2014).
- 865 53. King, C. H. Parasites and poverty: The case of schistosomiasis. *Acta Trop.* **113**,  
866 95–104 (2010).
- 867 54. Younes, A., El-Sherief, H., Gawish, F. & Mahmoud, M. Biological control of snail  
868 hosts transmitting schistosomiasis by the water bug, *Sphaerodema urinator*.  
869 *Parasitol. Res.* **116**, 1257–1264 (2017).
- 870 55. Karplus, I. & Sagi, A. in *Freshwater Prawns* 316–345 (Wiley-Blackwell).  
871 doi:10.1002/9781444314649.ch16
- 872 56. Ventura, T. & Sagi, A. The insulin-like androgenic gland hormone in  
873 crustaceans: From a single gene silencing to a wide array of sexual  
874 manipulation-based biotechnologies. *Biotechnol. Adv.* **30**, 1543–1550 (2012).
- 875 57. Aflalo, E. D. *et al.* A novel two-step procedure for mass production of all-male  
876 populations of the giant freshwater prawn *Macrobrachium rosenbergii*.  
877 *Aquaculture* **256**, 468–478 (2006).
- 878 58. Levy, T. *et al.* A Single Injection of Hypertrophied Androgenic Gland Cells  
879 Produces All-Female Aquaculture. *Mar. Biotechnol.* **18**, 554–563 (2016).
- 880 59. Gurarie, D., Lo, N. C., Ndeffo-Mbah, M. L., Durham, D. P. & King, C. H. The  
881 human-snail transmission environment shapes long term schistosomiasis  
882 control outcomes: Implications for improving the accuracy of predictive  
883 modeling. *PLoS Negl. Trop. Dis.* **12**, e0006514 (2018).
- 884 60. Civitello, D. J., Fatima, H., Johnson, L. R., Nisbet, R. M. & Rohr, J. R. Bioenergetic  
885 theory predicts infection dynamics of human schistosomes in intermediate  
886 host snails across ecological gradients. *Ecol. Lett.* **21**, 692–701 (2018).
- 887 61. Perez-Saez, J. *et al.* A Theoretical Analysis of the Geography of Schistosomiasis  
888 in Burkina Faso Highlights the Roles of Human Mobility and Water Resources  
889 Development in Disease Transmission. *PLoS Negl. Trop. Dis.* **9**, e0004127  
890 (2015).
- 891 62. Perez-Saez, J. *et al.* Hydrology and density feedbacks control the ecology of  
892 intermediate hosts of schistosomiasis across habitats in seasonal climates.  
893 *Proc. Natl. Acad. Sci.* **113**, 6427–6432 (2016).
- 894 63. Etim, L. & Sankare, Y. Growth and mortality, recruitment and yield of the  
895 fresh-water shrimp, *Macrobrachium vollenhovenii*, Herklots 1851 (Crustacea,  
896 Palaemonidae) in the Fahe reservoir, Côte d’Ivoire, West Africa. *Fish. Res.* **38**,  
897 211–223 (1998).
- 898 64. Dasgupta, S. Economics of freshwater prawn farming in the United States.  
899 *South. Reg. Aquac. Cent.* **Nov**, 1–8 (2005).

- 900 65. Tidwell, J. H., D'Abramo, L. R., Coyle, S. D. & Yasharian, D. Overview of recent  
901 research and development in temperate culture of the freshwater prawn  
902 (*Macrobrachium rosenbergii* De Man) in the South Central United States.  
903 *Aquac. Res.* **36**, 264–277 (2005).
- 904 66. Woolhouse, M. E. J. & Chandiwana, S. K. Population biology of the freshwater  
905 snail *Bulinus globosus* in the Zimbabwe highveld. *J. Appl. Ecol.* **27**, 41–59  
906 (1990).
- 907 67. Woolhouse, M. E. J. & Chandiwana, S. K. Population Biology of the Freshwater  
908 Snail *Bulinus globosus* in the Zimbabwe Highveld. *J. Appl. Ecol.* **27**, 41 (1990).
- 909 68. McCreesh, N. & Booth, M. The Effect of Increasing Water Temperatures on  
910 *Schistosoma mansoni* Transmission and *Biomphalaria pfeifferi* Population  
911 Dynamics: An Agent-Based Modelling Study (vol 9, e101462, 2014). *PLoS One*  
912 **9**, (2014).
- 913 69. Head, J. R. *et al.* Genetic Evidence of Contemporary Dispersal of the  
914 Intermediate Snail Host of *Schistosoma japonicum*: Movement of an NTD Host  
915 Is Facilitated by Land Use and Landscape Connectivity. *PLoS Negl. Trop. Dis.*  
916 **10**, e0005151 (2016).
- 917 70. McCreesh, N., Arinaitwe, M., Arineitwe, W., Tukahebwa, E. M. & Booth, M.  
918 Effect of water temperature and population density on the population  
919 dynamics of *Schistosoma mansoni* intermediate host snails. *Parasit. Vectors* **7**,  
920 9 (2014).
- 921 71. Pflüger, W., Roushdy, M. Z. & El Emam, M. The prepatent period and cercarial  
922 production of *Schistosoma haematobium* in *Bulinus truncatus* (Egyptian field  
923 strains) at different constant temperatures. *Zeitschrift für Parasitenkd. (Berlin,*  
924 *Ger.* **70**, 95–103 (1984).
- 925 72. King, C. H., Dickman, K. & Tisch, D. J. Reassessment of the cost of chronic  
926 helminthic infection: a meta-analysis of disability-related outcomes in endemic  
927 schistosomiasis. *Lancet* **365**, 1561–1569 (2005).
- 928 73. Cheever, A. W. A quantitative post-mortem study of schistosomiasis mansoni  
929 in man. *Am. J. Trop. Med. Hyg.* **17**, (1977).
- 930
